# Supplementary material for: Socioeconomic inequalities in youth smoking in Brazil
Source: PubMed Central journal article supplement — BMJ Open. 2013 Dec 2;3(12):e003538. doi: 10.1136/bmjopen-2013-003538 (PMC3855598; doi:10.1136/bmjopen-2013-003538), 2013-12-02
Supplement: bmjopen-2013-003538.draft_revisions.pdf [file bmjopen-2013-003538.draft_revisions.pdf]

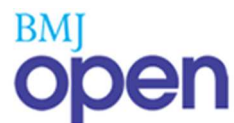

## Socioeconomic inequalities in youth smoking in Brazil

|                                    |                                                                                                                                                                                                                                       |
|------------------------------------|---------------------------------------------------------------------------------------------------------------------------------------------------------------------------------------------------------------------------------------|
| Journal:                           | <i>BMJ Open</i>                                                                                                                                                                                                                       |
| Manuscript ID:                     | bmjopen-2013-003538                                                                                                                                                                                                                   |
| Article Type:                      | Research                                                                                                                                                                                                                              |
| Date Submitted by the Author:      | 03-Jul-2013                                                                                                                                                                                                                           |
| Complete List of Authors:          | Barreto, Sandhi Maria; Universidade Federal de Minas Gerais, Preventive Medicine<br>Figueiredo, Roberta; Universidade Federal de Minas Gerais,<br>Giatti, Luana; Universidade Federal de Ouro Preto, Clinical and Social<br>Nutrition |
| <b>Primary Subject<br>Heading</b>: | Epidemiology                                                                                                                                                                                                                          |
| Secondary Subject Heading:         | Smoking and tobacco, Public health, Health policy, Addiction                                                                                                                                                                          |
| Keywords:                          | PUBLIC HEALTH, PREVENTIVE MEDICINE, Substance misuse <<br>PSYCHIATRY, SOCIAL MEDICINE                                                                                                                                                 |
|                                    |                                                                                                                                                                                                                                       |

SCHOLARONE™  
Manuscripts

Peer review only

**Title Page****Research article****Socioeconomic inequalities in youth smoking in Brazil**

Sandhi Maria Barreto<sup>1</sup>, Roberta Carvalho de Figueiredo<sup>1</sup>, Luana Giatti<sup>1,2</sup>

1- Postgraduate Program in Public Health, Faculty of Medicine, Universidade Federal de Minas Gerais, Belo Horizonte, Brazil

2- Department of Clinical and Social Nutrition, Universidade Federal de Ouro Preto, Ouro Preto, Brazil

**Address for correspondence:**

Prof. Sandhi M Barreto  
Faculdade de Medicina da UFMG  
Av Alfredo Balena 100, sala 814  
CEP: 30130-100  
Belo Horizonte – Minas Gerais, Brasil  
Telefax: 5531-34099016  
E-mail: sandhi.barreto@gmail.com

**Running title: Smoking among Brazilian adolescents**

**Keywords:** Smoking, Adolescence, Social determinants of health, Health behaviour

**Word****count:**

## Abstract

**Objective:** The contribution of smoking to socioeconomic inequalities in health is increasing worldwide, including in Brazil. Youth smoking may play important role in the increasing social inequalities related to smoking. This study investigates social determinants of smoking among 15- to 19 year-old individuals.

**Design:** Cross-sectional study

**Setting:** Study uses data of 3,464 participants aged 15-19 years participants of the Global Tobacco Survey (GATS) and the National Household Sample Survey (PNAD) obtained from household interviews. Smoking was defined as currently smoking tobacco products, regardless of frequency. Household socioeconomic indicators included per capita income, the educational level and sex of the head of the household, the presence of smoking restrictions and the number of smokers (excluding adolescents). Adolescent social factors included years of delaying school and social status (full-time student, working, and neither working nor studying). The hierarchical logistic regression analysis considered the effect of the complex sampling design.

**Results:** From 3,464 participants, 5.4% were smokers (95%CI: 5.1-5.7). More males than females smoked (6.4%; 6.0-6.8 vs 3.4%; 3.1-3.8). The likelihood of smoking was significantly greater for male teens and older teens. There was an upward trend in the OR of smoking according to the number of smokers in the house. Adolescents living in households with no smoking restrictions had a greater likelihood of being smokers. OR of smoking rose as the number of years of delaying school increased being about three times greater among adolescents who working and five times greater among those who were neither studying nor working.

1  
2  
3 **Conclusions:** Results demonstrate that socioeconomic inequality in smoking is  
4 established at younger ages and that school retention and dropping out might perpetuate  
5 and increase smoking-related inequalities. Smoking restrictions at home were protective  
6 against adolescents becoming smokers. Living with other smokers was a strong  
7 predictor of adolescents becoming smokers.  
8  
9  
10  
11  
12  
13  
14  
15  
16  
17  
18  
19  
20  
21  
22  
23  
24  
25  
26  
27  
28  
29  
30  
31  
32  
33  
34  
35  
36  
37  
38  
39  
40  
41  
42  
43  
44  
45  
46  
47  
48  
49  
50  
51  
52  
53  
54  
55  
56  
57  
58  
59  
60

## Article Summary

**Article Focus:** We investigated the social determinants of current smoking among 15- to 19-year-old Brazilian participants in the Global Tobacco Survey (GATS) Brazil. In particular, we tested whether delaying of school and dropping out of school, which are regarded as early markers of future socioeconomic disadvantage, were associated with youth smoking.

### Key messages:

- Youth smoking is associated with delaying of school and dropping out of school, as well as with early entry into the work force.
- Adolescents exposed to smokers at home have a much greater chance of being a smoker than adolescents who are not.
- Smoking restrictions at home were protective against youth smoking.

### Strengths and limitations of this study:

- The main strength of this study is its analysis of the social determinants, both at the household and individual levels, of teenage smoking using a nationwide household sample in a large middle-income country.
- The main limitation is the lack of information about the relationship between adolescents and other smokers in the household.

## INTRODUCTION

Cigarette smoking has fallen sharply in Brazil; in approximately two decades, the smoking prevalence among individuals aged 18 years and older decreased 48%, from 34.8% in 1989 to 18.2% in 2008<sup>1</sup>, preventing almost 420,000 (260,000-715,000) deaths.<sup>2</sup> Such achievements have been attributed largely to Brazil's strong upstream anti-tobacco policies, combined with increased access to tobacco cessation treatments.<sup>2</sup>

However, the contribution of smoking to socioeconomic inequalities in health is increasing in Brazil. According to data from the World Health Survey, 2002-04, smoking rates were higher among poor men and women (74% and 59%, respectively), even after controlling for age, marital status, education, employment and urban/rural residence.<sup>4</sup> The results of the Global Tobacco Survey (GATS) Brazil showed that there were almost twice as many tobacco users with no or less than a year of schooling, compared to tobacco users with 11 or more years of education.<sup>5</sup>

Early initiation of tobacco use could be a key component in the increasing social inequalities of smoking and its related morbidity and mortality.<sup>6</sup> Analyses of three birth cohorts in Italy showed that the increase in smoking inequalities among both men and women was mainly due to growing inequalities in smoking initiation rates. Studies have shown that most regular adult smokers become addicted in their teens.<sup>7-9</sup> In addition, early smoking has been associated with higher levels of tobacco dependence, increased difficulty in smoking cessation and more negative health outcomes in adulthood.<sup>10-13</sup>

In 2004, approximately 70% of adult smokers residing in large Brazilian cities had begun to smoke before the age of 20 years.<sup>14</sup> However, youth smoking seems far

1  
2  
3 more frequent among socially disadvantaged groups.<sup>15,16</sup> In Brazil, among daily or  
4  
5 former daily smokers, the proportion of individuals who started smoking before 15  
6  
7 years of age was two-fold greater among those with no or less than one year of  
8  
9 schooling than among those with eight years of schooling or more.<sup>5</sup>

11 Few studies have specifically addressed the social determinants of teenage  
12  
13 smoking in Brazil,<sup>17, 18, 19</sup> and none have been undertaken in a nationwide household  
14  
15 sample. This study investigated the social determinants of current smoking among  
16  
17 participants 15 to 19 years of age in the Global Tobacco Survey (GATS) Brazil. In  
18  
19 particular, we investigated whether delaying of school and dropping out of school,  
20  
21 which are regarded as early markers of future socioeconomic disadvantage, were  
22  
23 independently associated with smoking among teenagers.  
24  
25  
26  
27  
28

## 29 **METHODS**

### 30 **Participants**

31  
32 This study used data from the Global Tobacco Survey (GATS), the National Health  
33  
34 Survey (NHS) and the National Household Sample Survey (PNAD); surveys were  
35  
36 conducted jointly in 2008 by the Brazilian Institute of Geography and Statistics (IBGE)  
37  
38 and the Ministry of Health. GATS Brazil used a four-stage complex probabilistic  
39  
40 household sample (municipality, census tract, household and individual) and was  
41  
42 representative of the national and regional levels. Further details on the sampling design  
43  
44 can be found at [http://www.who.int/tobacco/surveillance/en\\_tfi\\_gats\\_2010\\_brazil.pdf](http://www.who.int/tobacco/surveillance/en_tfi_gats_2010_brazil.pdf).  
45  
46  
47  
48

49 Together, the questionnaires of these surveys provided socioeconomic  
50  
51 information about households and selected individual characteristics, including detailed  
52  
53 information on tobacco use and exposure. GATS Brazil aimed to include 40,000  
54  
55 individuals aged 15 years and older with a response rate of 95.2%. Out of 39,425  
56  
57  
58  
59  
60

1  
2  
3 interviews, 33,680 were conducted in urban areas and 5,745 in rural areas. Bearing in  
4  
5 mind our objectives, we studied all adolescents aged 15 to 19 years who participated in  
6  
7 GATS Brazil, totalling 3,464 individuals.  
8  
9

## 10 11 **Variables**

12  
13  
14 The response variable of the study was current smoking, defined as being a current  
15  
16 smoker regardless of frequency, and it was grouped into two categories (yes, no). The  
17  
18 proportion of daily smokers, age at initiation and the number of cigarettes smoked per  
19  
20 day among daily smokers were used to describe smoking behaviour.  
21  
22

23 The explanatory variables were grouped into three sets of co-variables in this  
24  
25 analysis. Household socioeconomic factors included location (urban, rural), household  
26  
27 per capita income grouped in quintiles, highest education level attained by the head of  
28  
29 the household in number of years completed (0-8, 9-11, 12-14, 15 and more) and female  
30  
31 head of household (no, yes).  
32  
33

34 The second set of co-variables consisted of household smoking characteristics,  
35  
36 which included the number of smokers in the household, excluding the participating  
37  
38 adolescent (zero, one, two, three or more), and smoking restrictions at home (not  
39  
40 allowed, generally not allowed, allowed). The category “allowed” also included an  
41  
42 absence of smoking restrictions.  
43  
44

45 The last set of co-variables included the adolescents’ characteristics: sex; age  
46  
47 (15, 16, 17, 18, 19 years old); self-declared race/skin colour (white, black, brown, Asian  
48  
49 descent and indigenous); social status (full-time student, only working, working and  
50  
51 studying and neither studying/neither working); and school delay, defined as the  
52  
53 difference in years of schooling between the individual’s current school grade and the  
54  
55 school grade in which he/she was expected to be given his/her age (none, one, two,  
56  
57  
58  
59  
60



1  
2  
3 three years or more). A negative difference in school delay was treated as no difference.  
4  
5 Asian descent and indigenous were combined as “other” because the number of  
6  
7 individuals was very small.  
8  
9

### 10 11 12 **Statistical analysis**

13  
14 First, we described the prevalence of smoking, the proportion (with 95% confidence  
15  
16 intervals) of daily smokers, age at initiation and the mean and median numbers of  
17  
18 cigarettes smoked per day by sex. Next, we performed a descriptive analysis of the  
19  
20 distribution of adolescents according to individual and household socioeconomic  
21  
22 indicators (Table 1).  
23

24  
25 Associations between each explanatory variable and current smoking were  
26  
27 measured by Pearson’s chi-square test with a p-value <0.05. Variables with p<0.20 were  
28  
29 included in the multivariable analysis. The magnitude of the associations was measured  
30  
31 using odds ratios (ORs), and 95% CIs were obtained by multiple logistic regression.  
32  
33 The “svy” procedure, available in Stata, version 11.0, was used to account for the effect  
34  
35 of the GATS complex survey design. Multicollinearity among household co-variables  
36  
37 was assessed using a variance inflation factor and the condition number.  
38  
39 Multicollinearity was not found among the variables (Tables 2-3).  
40  
41  
42

43  
44 To account for the hierarchical levels of the determination of youth smoking,  
45  
46 multivariable analysis was performed, assuming that the socioeconomic household  
47  
48 factors were the most distal factors, household smoking indicators were intermediate  
49  
50 factors, and individual socioeconomic factors were the most proximal factors.<sup>20</sup> Thus,  
51  
52 after considering the sex and age of the adolescents, we began hierarchical modelling by  
53  
54 simultaneously introducing the distal variables (educational level of the head of the  
55  
56 household, sex and household per capita income), keeping the factors related to  
57  
58  
59  
60

1  
2  
3 smoking that remained statistically significant ( $p < 0.05$ ) (Model 1). Then, we entered  
4 household smoking factors (number of smokers and smoking restrictions) and kept the  
5 statistically significant factors (Model 2). Finally, we added the youth level of education  
6 and social status factors, retaining only the proximal factors that were statistically  
7 significant (Model 3). The analysis was controlled for potential confounders — in this  
8 case, the variables maintained from the previous stages. The proximal variables were  
9 adjusted for the distal and intermediate variables (Table 3).  
10  
11  
12  
13  
14  
15  
16  
17  
18  
19

## 20 RESULTS

21  
22 Among the participants, 5.4% were current smokers (95% CI: 5.1-5.7), and 5.0% (95%  
23 CI: 4.7-5.2) reported being daily smokers, with a statistically significant difference  
24 between male and female subjects (male: 6.4%; 95% CI 6.0-6.8; female: 3.4%; 95% CI  
25 3.1-3.8;  $p < 0.001$ ). All of the current smokers had smoked at least 100 cigarettes in their  
26 lifetimes. Among daily smokers, the mean (and median) numbers of cigarettes smoked  
27 per day were 10.7 (10.0), which were approximately the same in male (10.8 and [10.0])  
28 and female subjects (10.5 and [10.0]).  
29  
30  
31  
32  
33  
34  
35  
36  
37

38 The distributions of participants according to socioeconomic and household  
39 characteristics are presented in Table 1. Almost 60% of the adolescents were between  
40 17 and 19 years of age, a great majority lived in urban dwellings, half were male, and  
41 54% (95% CI: 52.3-55.7) matched the level of schooling expected for their ages (Table  
42 1). Most of the participants were full-time students at the time of the interview. In total,  
43 61% of adolescents lived in households concentrated between the first (lowest) and  
44 third quintiles of income distribution, and the majority lived in houses headed by men  
45 with up to eight years of schooling and in households with smoking restrictions.  
46  
47  
48  
49  
50  
51  
52  
53  
54  
55  
56  
57  
58  
59  
60

1  
2  
3 In the univariable analysis (Table 2), male sex, older age and black skin colour  
4 were all significantly associated with a greater likelihood of being a regular smoker. The  
5 following factors in the household context were significantly associated with an  
6 increased chance of an adolescent being a current smoker: being in the fourth quintile of  
7 per capita income distribution and the head of the household having a lower level of  
8 education. The odds ratio of smoking increased with the number of smokers in the same  
9 household, and it was greater in homes in which smoking was allowed. The chance of  
10 smoking rose as the number of delayed years of education increased, and it was greater  
11 among adolescents who were studying and working, only working or neither studying  
12 nor working, compared to full-time students at the time of data collection.  
13  
14  
15  
16  
17  
18  
19  
20  
21  
22  
23  
24

25 In the hierarchical analysis (Table 3), exposure to tobacco smoking remained  
26 significantly lower among female subjects, although it increased with age. In the  
27 household context, the association between smoking and the educational level of the  
28 head of the household was no longer significant ( $p=0.847$ ,  $p=0.082$  and  $p=0.077$  for 9-  
29 11, 12-14 and 15 or more years of schooling, respectively). Additionally, in the  
30 household context, the OR, regarding the number of smokers in the household, for  
31 being exposed to three or more smokers was as high as 7.22 (95% CI: 3.16-16.46),  
32 demonstrating a significant upward trend ( $p<0.001$ ). Additionally, exposure to tobacco  
33 smoking remained significantly higher among adolescents living in households with  
34 smoking restrictions. After considering the effects of household socioeconomic and  
35 smoking factors, the chances of smoking remained significantly associated with the  
36 number of years of delaying of school, showing a significant upward trend ( $p<0.001$ ).  
37 Compared to adolescents who were full-time students, those who were only working or  
38 who were working and studying had an approximately three times greater chance of  
39  
40  
41  
42  
43  
44  
45  
46  
47  
48  
49  
50  
51  
52  
53  
54  
55  
56  
57  
58  
59  
60

1  
2  
3 being a smoker, while those who were neither studying nor working had a roughly five  
4  
5 times greater chance of being a smoker.  
6

## 7 **DISCUSSION**

8  
9 Our results confirm that slow progress at school, as well as dropping out of school, and  
10  
11 early entrance into the work force are associated with a greater likelihood of tobacco  
12  
13 smoking among teenagers. In general, our results support the hypothesis that  
14  
15 socioeconomic inequality in smoking is established at younger ages. In addition, our  
16  
17 results confirm the importance of household smoking exposure in teenage smoking,  
18  
19 reinforcing the evidence that smoking behaviour can be contagious.<sup>21, 22</sup> The findings  
20  
21 are particularly relevant as socioeconomic disparities in smoking behaviour among  
22  
23 youth are predictive of future disparities in smoking, as well as in morbidity and  
24  
25 mortality from chronic diseases.<sup>23</sup>  
26  
27

28  
29 We found important and strong associations between school engagement and  
30  
31 smoking. The chances of smoking were substantially greater among adolescents who  
32  
33 were no longer attending school, regardless of what they were currently doing.  
34  
35 Moreover, we also found that the chances of smoking increased as the number of years  
36  
37 of school delay increased. School delay and dropping out are important markers of both  
38  
39 current and future lower socioeconomic status, independent of youth health, parental  
40  
41 education and sex.<sup>24</sup> A recently published analysis of US survey data showed that at the  
42  
43 population level, education gaps among adult smokers are produced mostly by  
44  
45 educational inequalities in initiation rather than in quitting smoking.<sup>25</sup>  
46  
47

48  
49 Likely explanations for the association between school delay and dropping out  
50  
51 and smoking include less information on the health consequences of smoking and  
52  
53 differences in access to and effectiveness of cessation treatments. Lower reading skills  
54  
55 were associated with becoming a regular smoker, as well as the current amount smoked,  
56  
57  
58  
59  
60

1  
2  
3 in a cohort analysis.<sup>26</sup> Several studies have indicated that failure to complete high  
4  
5 school is associated with substance use, including the use of tobacco.<sup>27</sup>  
6

7  
8 Educational underachievement and dropping out of school remain serious  
9  
10 problems in Brazilian society: only 50% of adolescents who enter high school will  
11  
12 graduate. In 2009, 15% of adolescents 15 to 17 years of age were not in high school.  
13  
14 Among those who were enrolled, one-third were not in the correct school grade for their  
15  
16 ages.<sup>28</sup> Researchers in the area have cited dismay, poverty, early parenthood and  
17  
18 criminal involvement among the main reasons for this finding.<sup>28</sup>  
19

20  
21 The household environment is the most important source of cultural and social  
22  
23 values for children and adolescents, and it is the most proximal context for them.  
24  
25 Adolescents from non-smoking homes are less likely to start or develop smoking habits.  
26  
27 <sup>29</sup>Our results showed a very sharp, positive relationship between the number of smokers  
28  
29 in the household and the likelihood that a youth would smoke. There is compelling  
30  
31 evidence that children of smoking parents are more likely to initiate smoking in  
32  
33 adolescence than children of non-smoking parents, thus transmitting the single greatest  
34  
35 cause of preventable death from generation to generation.<sup>29</sup> Beyond promoting  
36  
37 smoking, exposure to other smokers at home also seemed to hamper quitting attempts  
38  
39 and smoking cessation among adolescent Chinese smokers.<sup>30</sup>  
40  
41  
42

43  
44 Additionally, our results corroborate the growing and consistent evidence that  
45  
46 home smoking restrictions protect non-smokers from second-hand smoke and influence  
47  
48 the smoking behaviour of adult smokers. These results also suggest that parental  
49  
50 smoking might interact with home smoking restrictions to impact youth smoking  
51  
52 behaviour, further reinforcing the anti-smoking values of non-smoking parents. In  
53  
54 addition, a completely smoke-free home appears to send a stronger anti-smoking  
55  
56 message than partial restrictions, and a smoke-free home might be more influential in  
57  
58  
59  
60

1  
2  
3 earlier, rather than later, stages of the smoking continuum.<sup>29-33</sup> Late adolescence is a  
4  
5 period characterised by increasing role instability and major life options, such as  
6  
7 whether to start working, go to college, leave home and so on. As adolescents approach  
8  
9 adulthood, unhealthy behaviours initiated earlier might be abandoned or could develop  
10  
11 into more consolidated attitudes. Thus, it is a crucial period to approach the promotion  
12  
13 of health. Our results support the evidence that socioeconomic inequalities in smoking  
14  
15 begin in adolescence and are likely to endure and even increase because smoking is  
16  
17 linked to school delay and dropping out, which reduce the likelihood of having a better  
18  
19 job and better life conditions in the future.  
20  
21  
22  
23  
24

### 25 **Comments and limitations**

26  
27 Unfortunately, our work lacked information about parent and adolescent peer  
28  
29 behaviours, which are known to be important risk factors for smoking. In addition, we  
30  
31 had no data on the relationship between the respondents and other smokers in the  
32  
33 household. For this reason, we cannot estimate whether smoking parents, compared to  
34  
35 other smokers, had a different impact on adolescent smoking. Despite being a cross-  
36  
37 sectional study, it is quite unlikely that youth smoking produces disadvantages at the  
38  
39 household level. It is possible, however, that youth smoking is involved in youth school  
40  
41 performance in a vicious cycle: the same problems that result in poor performance at  
42  
43 school (or dropping out) also influence smoking, and these two behaviours reinforce  
44  
45 each other. We believe that low socioeconomic status, with all that it implies (in terms  
46  
47 of culture and access to information), is the primary factor behind these behaviours.  
48  
49  
50

51  
52 The major associations observed in this study indicate that keeping teenagers in  
53  
54 school could help to prevent smoking and to reduce the health inequalities associated  
55  
56 with this habit. It is undeniable that adolescents must be in school. However, because  
57  
58  
59  
60

1  
2  
3 smoking seems to be a transmissible habit, reducing delays in education and dropping  
4  
5 out of school must accompany reductions in smoking exposure in the home.  
6  
7

### 8 **Acknowledgments**

9  
10 SMB is a research fellow of the National Research Council (CNPq, grant no.  
11  
12 300159/99-4). RCF received a research grant from CNPq.  
13  
14

15  
16  
17 SMB and LG performed the statistical analyses. All of the authors wrote the paper, and  
18  
19 they were responsible for the final content of the manuscript. All of the authors  
20  
21 contributed to the design of the research and read, edited and approved of the final draft  
22  
23 of the manuscript.  
24  
25

26  
27  
28 **Funding:** None  
29

30 **Competing interests:** None  
31

32  
33 **Ethics approval:** This study was conducted with the approval of the Brazilian National  
34  
35 Ethics Committee.  
36

37 **Data Sharing:** No similar data from this study have been previously published.  
38  
39  
40  
41  
42  
43  
44  
45  
46  
47  
48  
49  
50  
51  
52  
53  
54  
55  
56  
57  
58  
59  
60

1  
2  
3  
4  
5  
6  
7  
8  
9  
10  
11  
12  
13  
14  
15  
16  
17  
18  
19  
20  
21  
22  
23  
24  
25  
26  
27  
28  
29  
30  
31  
32  
33  
34  
35  
36  
37  
38  
39  
40  
41  
42  
43  
44  
45  
46  
47  
48  
49  
50  
51  
52  
53  
54  
55  
56  
57  
58  
59  
60

**Tables**

**Table 1** Distribution of participants according to socioeconomic and household characteristics. Brazil - 2008.

| Characteristics                       | %    | 95%CI     |
|---------------------------------------|------|-----------|
| <b>Sex</b>                            |      |           |
| Male                                  | 50.4 | 48.6-52.3 |
| Female                                | 49.6 | 47.7-51.4 |
| <b>Age (years)</b>                    |      |           |
| 15-16                                 | 40.9 | 39.1-42.7 |
| 17-19                                 | 59.1 | 57.0-60.8 |
| <b>Self declared race/skin colour</b> |      |           |
| White                                 | 44.7 | 43.1-46.4 |
| Black                                 | 6.5  | 5.6-7.4   |
| Brown                                 | 48.1 | 46.4-49.8 |
| Other                                 | 0.7  | 0.3-0.8   |
| <b>School delay</b>                   |      |           |
| None                                  | 54.0 | 52.3-55.7 |
| One                                   | 12.5 | 11.3-13.7 |
| Two                                   | 10.5 | 9.3-11.5  |
| Three or more                         | 23.0 | 21.5-24.4 |
| <b>Social Status</b>                  |      |           |
| Full student                          | 46.3 | 44.4-48.1 |
| Only working or working and studying  | 40.2 | 38.4-42.0 |
| Neither studying/Neither working      | 13.5 | 12.2-14.7 |
| <b>Household per capita income</b>    |      |           |
| 1 <sup>o</sup> quintile (lowest)      | 20.8 | 19.3-22.3 |
| 2 <sup>o</sup> quintile               | 20.7 | 19.2-22.2 |
| 3 <sup>o</sup> quintile               | 19.9 | 18.3-21.3 |
| 4 <sup>o</sup> quintile               | 18.9 | 17.5-20.3 |
| 5 <sup>o</sup> quintile (highest)     | 19.7 | 18.2-20.9 |



| <b>Education of household head (years)</b> |      |           |
|--------------------------------------------|------|-----------|
| 0-8                                        | 55.9 | 54.2-57.7 |
| 9-11                                       | 16.8 | 15.4-18.1 |
| 12-14                                      | 21.6 | 20.1-23.1 |
| 15+                                        | 5.7  | 4.7-6.4   |
| <b>Female-headed household</b>             |      |           |
| No                                         | 62.2 | 64.4-63.9 |
| Yes                                        | 37.8 | 36.0-39.5 |
| <b>Urban/rural dwelling</b>                |      |           |
| Urban                                      | 82.9 | 81.6-84.2 |
| Rural                                      | 17.1 | 15.7-18.3 |
| <b>Number of smokers in the household</b>  |      |           |
| Zero                                       | 65.5 | 63.7-67.2 |
| One                                        | 25.3 | 23.6-26.8 |
| Two                                        | 8.1  | 7.1-9.1   |
| Three or more                              | 1.1  | 0.7-1.5   |
| <b>Smoking restrictions rules at home</b>  |      |           |
| Not allowed                                | 46.4 | 44.5-48.1 |
| Generally not allowed                      | 13.3 | 12.0-14.5 |
| Allowed                                    | 40.3 | 38.5-42.1 |

Source: Brazilian National Household Sample Survey (PNAD, 2008) and Global Tobacco Survey (GATS-2008)

\* Included Asian descendent and Indigenous

**Table 2** Odds Ratio (OR) of regular smoking\* according to adolescents' socio demographic features and household socioeconomic and smoking characteristics. Brazil - 2008.

| Characteristics                       | OR (95% CI)         | p Value |
|---------------------------------------|---------------------|---------|
| <b>Adolescents' characteristics</b>   |                     |         |
| <b>Sex</b>                            |                     |         |
| Male                                  | 1.00                | <0.01   |
| Female                                | 0.47 (0.33 - 0.64)  |         |
| <b>Age (years)</b>                    |                     |         |
| 15-16                                 | 1.00                | <0.01   |
| 17-19                                 | 3.77 (2.63 - 5.39)  |         |
| <b>Self declared race/skin colour</b> |                     |         |
| White                                 | 1.00                |         |
| Black                                 | 1.70 (1.05 - 2.75)  | 0.030   |
| Brown                                 | 1.02 (0.77 - 1.36)  | 0.854   |
| Other**                               | 0.65 (0.08 - 4.84)  | 0.672   |
| <b>Social Status</b>                  |                     |         |
| Full student                          | 1.00                |         |
| Only working or working and studying  | 4.73 (3.22 - 6.92)  | <0.001  |
| Neither studying/Neither working      | 6.99 (4.56 - 10.70) | <0.001  |
| <b>School delay</b>                   |                     |         |
| None                                  | 1.00                |         |
| One                                   | 2.33 (1.41- 3.84)   | <0.001  |
| Two                                   | 3.40 (2.11 - 5.48)  | <0.001  |
| Three or more                         | 6.56 (4.62 - 9.33)  | <0.001  |
| <b>Household characteristics</b>      |                     |         |
| <b>Urban/rural dwelling</b>           |                     |         |
| Urban                                 | 1.00                |         |
| Rural                                 | 0.80 (0.54 - 1.19)  | 0.287   |
| <b>Household per capita income</b>    |                     |         |
| 5 <sup>0</sup> quintile (lowest)      | 1.00                |         |

|                                                |                     |        |
|------------------------------------------------|---------------------|--------|
| 4 <sup>0</sup> quintile                        | 1.63 (1.05 - 2.51)  | 0.028  |
| 3 <sup>0</sup> quintile                        | 1.03 (0.64 - 1.67)  | 0.314  |
| 2 <sup>0</sup> quintile                        | 1.23 (0.78 - 1.96)  | 0.361  |
| 1 <sup>0</sup> quintile (highest)              | 1.46 (0.93 - 2.28)  | 0.093  |
| <b>Head of the household schooling (years)</b> |                     |        |
| 0-8                                            | 1.00                |        |
| 9-11                                           | 0.57 (0.37 - 0.88)  | 0.011  |
| 12-14                                          | 0.59 (0.40 - 0.85)  | 0.005  |
| 15+                                            | 0.58 (0.29 - 1.16)  | 0.128  |
| <b>Female-headed household</b>                 |                     |        |
| No                                             | 1.00                |        |
| Yes                                            | 1.02 (0.77 - 1.35)  | 0.855  |
| <b>Number of smokers</b>                       |                     |        |
| Zero                                           | 1.00                |        |
| One                                            | 1.93 (1.42 - 2.63)  | <0.001 |
| Two                                            | 3.00 (1.98 - 4.53)  | <0.001 |
| Three or more                                  | 9.01 (4.45 - 18.19) | <0.001 |
| <b>Smoking restrictions rules</b>              |                     |        |
| Not allowed                                    | 1.00                |        |
| Generally not allowed                          | 1.47 (0.93 - 2.30)  | 0.092  |
| Allowed                                        | 2.18 (1.61 - 2.94)  | <0.001 |

Source: Brazilian National Household Sample Survey (PNAD, 2008) and Global Tobacco Survey (GATS-2008)

\*Report of having smoked 100 cigarettes in lifetime and currently smoking every day or not every day.

\*\* Included Asian descendent and Indigenous

**Table 3** Results of the hierarchical regression analyses in adolescents examined the association between individual and household characteristics and smoking\*. Brazil - 2008

| Variables                                      | Model 1            | Model 2             | Model 3             |
|------------------------------------------------|--------------------|---------------------|---------------------|
| <b>Household socioeconomic factors</b>         |                    |                     |                     |
| <b>Head of the household schooling (years)</b> |                    |                     |                     |
| 0-8                                            | 1.00               | 1.00                | 1.00                |
| 9-11                                           | 0.58 (0.38 – 0.90) | 0.67 (0.43 – 0.91)  | 0.95 (0.60 – 1.51)  |
| 12-14                                          | 0.57 (0.39 – 0.83) | 0.72 (0.48 – 1.05)  | 1.45 (0.95 – 2.22)  |
| 15+                                            | 0.59 (0.29 – 1.20) | 0.75 (0.36 – 1.65)  | 1.97 (0.93 – 4.17)  |
| <b>Household smoking characteristics</b>       |                    |                     |                     |
| <b>Number of smokers</b>                       |                    |                     |                     |
| —                                              | —                  | 1.00                | 1.00                |
| One                                            | —                  | 1.68 (1.21 – 2.35)  | 1.59 (1.13 – 2.23)  |
| Two                                            | —                  | 2.60 (1.67 – 4.06)  | 2.29 (1.44 – 3.64)  |
| Three or more                                  | —                  | 7.96 (3.70 – 17.11) | 7.22 (3.16 – 16.46) |
| <b>Smoking restrictions rules</b>              |                    |                     |                     |
| —                                              | —                  | —                   | —                   |
| Not allowed                                    | —                  | 1.00                | 1.00                |
| Generally not allowed                          | —                  | 1.21 (0.76 – 1.94)  | 1.32 (0.82 – 2.15)  |
| Allowed                                        | —                  | 1.53 (1.10 – 2.13)  | 1.49 (1.06 – 2.09)  |
| <b>Adolescents' characteristics</b>            |                    |                     |                     |
| <b>Sex</b>                                     |                    |                     |                     |
| Male                                           | 1.00               | 1.00                | 1.00                |
| Female                                         | 0.45 (0.34 - 0.61) | 0.43 (0.33 - 0.59)  | 0.45 (0.32 – 0.62)  |
| <b>Age (years)</b>                             |                    |                     |                     |
| 15-16                                          | 1.00               | 1.00                | 1.00                |
| 17-19                                          | 3.89 (2.71 - 5.58) | 3.95 (2.74 - 5.69)  | 2.38 (1.62 – 3.49)  |
| <b>Social Status</b>                           |                    |                     |                     |
| —                                              | —                  | —                   | —                   |
| Full student                                   | —                  | —                   | 1.00                |
| Only working or working and studying           | —                  | —                   | 2.81 (1.86 – 4.25)  |
| Neither studying/Neither working               | —                  | —                   | 4.56 (2.85 – 7.30)  |
| <b>School delay</b>                            |                    |                     |                     |
| —                                              | —                  | —                   | —                   |
| None                                           | —                  | —                   | 1.00                |
| One                                            | —                  | —                   | 2.34 (1.37 – 3.96)  |

|              |                    |
|--------------|--------------------|
| Two          | 2.81 (1.69 – 4.69) |
| Four or more | 4.27 (2.87 – 6.35) |

Source: Brazilian National Household Sample Survey (PNAD, 2008) and Global Tobacco Survey (GATS-2008)

\*Report of having smoked 100 cigarettes in lifetime and currently smoking every day or not every day.

All models adjusted for age, sex.

## REFERENCES

1. WHO. [http://www.who.int/tobacco/surveillance/en\\_tfi\\_gats\\_2010\\_brazil.pdf](http://www.who.int/tobacco/surveillance/en_tfi_gats_2010_brazil.pdf). (Accessed 20 May 2013).
2. Levy D, de Almeida LM, Szklo A. The Brazil SimSmoke Policy Simulation Model: The Effect of Strong Tobacco Control Policies on Smoking Prevalence and Smoking-Attributable Deaths in a Middle Income Nation. *PLoS Med* 2012; 9: e1001336.

- 1  
2  
3 3. Szklo AS, de Almeida LM, Figueiredo VC, et al. A snapshot of the striking decrease  
4  
5 in cigarette smoking prevalence in Brazil between 1989 and 2008. *Prev Med* 2012; 54:  
6  
7 162–67.  
8
- 9  
10 4. Hosseinpoor AR, Parker LA, d'Espaignet ET al. Socioeconomic Inequality  
11  
12 in Smoking in Low-Income and Middle-Income Countries: Results from the World  
13  
14 Health Survey. *PLoS One*. 2012; 7: e42843.  
15
- 16 5. Instituto Nacional de Câncer (Brasil). Global adult tobacco survey Brazil 2008 /  
17  
18 Instituto Nacional de Câncer. – Rio de Janeiro: INCA, 2010, 208 p. Available at :  
19  
20 [http://www.who.int/tobacco/surveillance/en\\_tfi\\_gats\\_2010\\_brazil.pdf](http://www.who.int/tobacco/surveillance/en_tfi_gats_2010_brazil.pdf).  
21  
22
- 23 6. Federico B, Costa G, Kunst AE. Educational inequalities in initiation, cessation, and  
24  
25 prevalence of smoking among 3 Italian birth cohorts. *Am J Public Health*.  
26  
27 2007;97(5):838-45.  
28
- 29 7. Giovino GA, Mirza SA, Samet JM, et al. Tobacco use in 3 billion individuals from 16  
30  
31 countries: an analysis of nationally representative cross-sectional household surveys.  
32  
33 *Lancet* 2012; 380:668-79.  
34  
35
- 36 8. Palipudi KM, Gupta PC, Sinha DN, et al. Social determinants of health and tobacco  
37  
38 use in thirteen low and middle income countries: evidence from Global Adult Tobacco  
39  
40 Survey. *PLoS One* 2012; 7: e33466.  
41  
42
- 43 9. Moolchan ET, Ernst M, Henningfield JE. A review of tobacco smoking in  
44  
45 adolescents: treatment implications. *J Am Acad Child Adolesc Psychiatry* 2000; 39:682-  
46  
47 93.  
48
- 49 10. Park S, Lee JY, Song TM et al. Age-associated changes in nicotine dependence.  
50  
51 *Publ. Health* 2012; 126: 482–89.  
52  
53  
54  
55  
56  
57  
58  
59  
60

- 1  
2  
3 11. Greenwood PA, Engels RC, Olsson CA ET AL. Patterns of adolescent smoking and  
4 later nicotine dependence in young adults: a 10-year prospective study. *Public*  
5 *Health* 2010; 124:65-70.  
6  
7  
8  
9  
10 12. O'Loughlin J, DiFranza J, Tyndale RF et al. Nicotine-dependence symptoms are  
11 associated with smoking frequency in adolescents. *Am J Prev Med* 2003; 25: 219–25.  
12  
13 13. Riggs NR, Chou CP, Li CY, Pentz MA. Adolescent to emerging adulthood smoking  
14 trajectories: when do smoking trajectories diverge, and do they predict early adulthood  
15 nicotine dependence? *Nicotine Tob Res* 2007; 9:1147–54.  
16  
17  
18  
19  
20 14. Household survey on behaviour risk factors and self-reported non-communicable  
21 diseases. Rio de Janeiro: National Cancer Institute, Health Surveillance Division,  
22 Ministry of Health; 2004.  
23  
24  
25  
26  
27 15. Goldade K, Choi K, Bernat DH, et al. Multilevel predictors of smoking initiation  
28 among adolescents: findings from the Minnesota Adolescent Community Cohort  
29 (MACC) study. *Prev Med* 2012; 54:242-6.  
30  
31  
32  
33 16. Tjora T, Hetland J, Aarø LE et al. Distal and proximal family predictors of  
34 adolescents' smoking initiation and development: A longitudinal latent curve model  
35 analysis *BMC Public Health* 2011; 11:911.  
36  
37  
38  
39  
40 17. Hallal PC, Clark VL, Assunção MC ET AL. Socioeconomic trajectories from birth  
41 to adolescence and risk factors for noncommunicable disease: prospective analyses. *J*  
42 *Adolesc Health* 2012; 51(6 Suppl):S32-S7  
43  
44  
45  
46  
47 18. Barreto SM, Giatti L, Casado L, et al. Contextual factors associated  
48 with smoking among Brazilian adolescents. *J Epidemiol Community Health* 2012; 66:  
49 723–29.  
50  
51  
52  
53  
54  
55  
56  
57  
58  
59  
60

- 1  
2  
3 19. Sanchez ZM, Opaleye ES, Martins SS et AL. Adolescent gender differences in the  
4 determinants of tobacco smoking: a cross sectional survey among high school students  
5 in São Paulo. *BMC Public Health* 2010; 10: 748.  
6  
7  
8  
9  
10 20. Victora CG, Huttly SR, Fuchs SC et al. The role of conceptual frameworks in  
11 epidemiological analysis: a hierarchical approach. *Int J Epidemiol* 1997; 26:224-7.  
12  
13  
14 21. Schuck K, Otten R, Engels RC et AL. Birectional influences between parents and  
15 children in smoking behavior: a longitudinal full-family model. *Nicotine Tob Res* 2013;  
16 15:44-51.  
17  
18  
19  
20  
21 22. Christakis NA, Fowler JH. Social contagion theory: examining  
22 dynamic social networks and human behavior. *Stat Med* 2013; 32:556-77.  
23  
24  
25 23. Wardle J, Jarvis MJ, Steggle N et al. Socioeconomic disparities in cancer-  
26 risk behaviors in adolescence: baseline results from the Health and  
27 Behaviour in Teenagers Study (HABITS). *Prev Med* 2003;36:721-30.  
28  
29  
30  
31  
32 24. De Ridder KA, Pape K, Johnsen R et al. School dropout: a major public health  
33 challenge: a 10-year prospective study on medical and non-medical social insurance  
34 benefits in young adulthood, the Young-HUNT 1 Study (Norway). *J Epidemiol*  
35 *Community Health* 2012; 66:995-1000.  
36  
37  
38  
39  
40 25. Maralani V. Educational inequalities in smoking: the role of initiation versus  
41 quitting. *Soc Sci Med*. 2013;84:129-37  
42  
43  
44  
45 26. Martin LT, Haas A, Schonlau M, et al. Which literacy skills are associated with  
46 smoking? *J Epidemiol Community Health* 2012; 66:189-92.  
47  
48  
49  
50 27. Henry KL, Knight KE, Thornberry TP. School disengagement as a predictor of  
51 dropout, delinquency, and problem substance use during adolescence and early  
52 adulthood. *J Youth Adolesc* 2012; 41:156-66.  
53  
54  
55  
56  
57  
58  
59  
60



- 1  
2  
3 28. IPEA  
4  
5 [http://www.ipea.gov.br/portal/index.php?option=com\\_content&view=article&id=15818](http://www.ipea.gov.br/portal/index.php?option=com_content&view=article&id=15818)  
6  
7 &catid=159&Itemid=75. (accessed 15 Feb 2013)  
8  
9  
10 29. Gilman SE, Rende R, Boergers J, et al. Parental smoking and adolescent smoking  
11 initiation: an intergenerational perspective on tobacco control. *Pediatrics* 2009; 123:  
12 e274-8.  
13  
14 30. Wang MP, Ho SY, Lo WS, et al. Smoking Family, Second-hand Smoke Exposure at  
15 Home, and Quitting in Adolescent Smokers. *Nicotine Tob Res* 2012; [Epub ahead of  
16 print].  
17  
18 31. Emory K, Saquib N, Gilpin EA et al. The association between  
19 home smoking restrictions and youth smoking behaviour: a review. *Tob Control* 2010;  
20 19:495-506.  
21  
22 32. Fichtenberg CM, Glantz SA. Effect of smoke-free workplaces on smoking  
23 behaviour: systematic review. *Br Med J* 2002;325:188.  
24  
25 33. Mills AL, Messer K, Gilpin E, et al. The effect of smoke-free homes on adult  
26 smoking behavior: a review. *Nicotine Tob Res* 2009;11:1131-41.  
27  
28  
29  
30  
31  
32  
33  
34  
35  
36  
37  
38  
39  
40  
41  
42  
43  
44  
45  
46  
47  
48  
49  
50  
51  
52  
53  
54  
55  
56  
57  
58  
59  
60

STROBE Checklist of items that should be included in reports of *cross-sectional studies*

Title: Socioeconomic inequalities among youth smoking in Brazil

Authors: Barreto SM, Figueiredo RC, Giatti L

|                              | Item No | Recommendation                                                                                                                                                                                    |    |
|------------------------------|---------|---------------------------------------------------------------------------------------------------------------------------------------------------------------------------------------------------|----|
| <b>Title and abstract</b>    | 1       | (a) Indicate the study's design with a commonly used term in the title or the abstract                                                                                                            | ok |
|                              |         | (b) Provide in the abstract an informative and balanced summary of what was done and what was found                                                                                               | ok |
| <b>Introduction</b>          |         |                                                                                                                                                                                                   |    |
| Background/rationale         | 2       | Explain the scientific background and rationale for the investigation being reported                                                                                                              | ok |
| Objectives                   | 3       | State specific objectives, including any prespecified hypotheses                                                                                                                                  | ok |
| <b>Methods</b>               |         |                                                                                                                                                                                                   |    |
| Study design                 | 4       | Present key elements of study design early in the paper                                                                                                                                           | ok |
| Setting                      | 5       | Describe the setting, locations, and relevant dates, including periods of recruitment, exposure, follow-up, and data collection                                                                   | ok |
| Participants                 | 6       | (a) Give the eligibility criteria, and the sources and methods of selection of participants                                                                                                       | ok |
| Variables                    | 7       | Clearly define all outcomes, exposures, predictors, potential confounders, and effect modifiers. Give diagnostic criteria, if applicable                                                          | ok |
| Data sources/<br>measurement | 8*      | For each variable of interest, give sources of data and details of methods of assessment (measurement). Describe comparability of assessment methods if there is more than one group              | ok |
| Bias                         | 9       | Describe any efforts to address potential sources of bias                                                                                                                                         | ok |
| Study size                   | 10      | Explain how the study size was arrived at                                                                                                                                                         | ok |
| Quantitative variables       | 11      | Explain how quantitative variables were handled in the analyses. If applicable, describe which groupings were chosen and why                                                                      | ok |
| Statistical methods          | 12      | (a) Describe all statistical methods, including those used to control for confounding                                                                                                             | ok |
|                              |         | (b) Describe any methods used to examine subgroups and interactions                                                                                                                               | ok |
|                              |         | (c) Explain how missing data were addressed                                                                                                                                                       | ok |
|                              |         | (d) If applicable, describe analytical methods taking account of sampling strategy                                                                                                                | ok |
|                              |         | (e) Describe any sensitivity analyses                                                                                                                                                             | ok |
| <b>Results</b>               |         |                                                                                                                                                                                                   |    |
| Participants                 | 13*     | (a) Report numbers of individuals at each stage of study—eg numbers potentially eligible, examined for eligibility, confirmed eligible, included in the study, completing follow-up, and analysed | ok |
|                              |         | (b) Give reasons for non-participation at each stage                                                                                                                                              | ok |
|                              |         | (c) Consider use of a flow diagram                                                                                                                                                                | ok |
| Descriptive data             | 14*     | (a) Give characteristics of study participants (eg demographic, clinical, social) and information on exposures and potential confounders                                                          | ok |
|                              |         | (b) Indicate number of participants with missing data for each variable of interest                                                                                                               | ok |
| Outcome data                 | 15*     | Report numbers of outcome events or summary measures                                                                                                                                              | ok |

|    |                          |    |                                                                                                                                                                                                              |
|----|--------------------------|----|--------------------------------------------------------------------------------------------------------------------------------------------------------------------------------------------------------------|
| 1  |                          |    |                                                                                                                                                                                                              |
| 2  | Main results             | 16 | (a) Give unadjusted estimates and, if applicable, confounder-adjusted estimates and their precision (eg, 95% confidence interval). Make clear which confounders were adjusted for and why they were included |
| 3  |                          |    |                                                                                                                                                                                                              |
| 4  |                          |    |                                                                                                                                                                                                              |
| 5  |                          |    |                                                                                                                                                                                                              |
| 6  |                          |    | (b) Report category boundaries when continuous variables were categorized                                                                                                                                    |
| 7  |                          |    |                                                                                                                                                                                                              |
| 8  |                          |    | (c) If relevant, consider translating estimates of relative risk into absolute risk for a meaningful time period                                                                                             |
| 9  |                          |    |                                                                                                                                                                                                              |
| 10 | Other analyses           | 17 | Report other analyses done—eg analyses of subgroups and interactions, and sensitivity analyses                                                                                                               |
| 11 |                          |    |                                                                                                                                                                                                              |
| 12 |                          |    |                                                                                                                                                                                                              |
| 13 | <b>Discussion</b>        |    |                                                                                                                                                                                                              |
| 14 | Key results              | 18 | Summarise key results with reference to study objectives                                                                                                                                                     |
| 15 | Limitations              | 19 | Discuss limitations of the study, taking into account sources of potential bias or imprecision. Discuss both direction and magnitude of any potential bias                                                   |
| 16 |                          |    |                                                                                                                                                                                                              |
| 17 |                          |    |                                                                                                                                                                                                              |
| 18 |                          |    |                                                                                                                                                                                                              |
| 19 | Interpretation           | 20 | Give a cautious overall interpretation of results considering objectives, limitations, multiplicity of analyses, results from similar studies, and other relevant evidence                                   |
| 20 |                          |    |                                                                                                                                                                                                              |
| 21 |                          |    |                                                                                                                                                                                                              |
| 22 |                          |    |                                                                                                                                                                                                              |
| 23 | Generalisability         | 21 | Discuss the generalisability (external validity) of the study results                                                                                                                                        |
| 24 |                          |    |                                                                                                                                                                                                              |
| 25 | <b>Other information</b> |    |                                                                                                                                                                                                              |
| 26 | Funding                  | 22 | Give the source of funding and the role of the funders for the present study and, if applicable, for the original study on which the present article is based                                                |
| 27 |                          |    |                                                                                                                                                                                                              |
| 28 |                          |    |                                                                                                                                                                                                              |
| 29 |                          |    |                                                                                                                                                                                                              |

\*Give information separately for exposed and unexposed groups.



## Socioeconomic inequalities in youth smoking in Brazil

|                                 |                                                                                                                                                                                                                                       |
|---------------------------------|---------------------------------------------------------------------------------------------------------------------------------------------------------------------------------------------------------------------------------------|
| Journal:                        | <i>BMJ Open</i>                                                                                                                                                                                                                       |
| Manuscript ID:                  | bmjopen-2013-003538.R1                                                                                                                                                                                                                |
| Article Type:                   | Research                                                                                                                                                                                                                              |
| Date Submitted by the Author:   | 15-Oct-2013                                                                                                                                                                                                                           |
| Complete List of Authors:       | Barreto, Sandhi Maria; Universidade Federal de Minas Gerais, Preventive Medicine<br>Figueiredo, Roberta; Universidade Federal de Minas Gerais,<br>Giatti, Luana; Universidade Federal de Ouro Preto, Clinical and Social<br>Nutrition |
| <b>Primary Subject Heading</b>: | Epidemiology                                                                                                                                                                                                                          |
| Secondary Subject Heading:      | Smoking and tobacco, Public health, Health policy, Addiction                                                                                                                                                                          |
| Keywords:                       | PUBLIC HEALTH, PREVENTIVE MEDICINE, Substance misuse <<br>PSYCHIATRY, SOCIAL MEDICINE                                                                                                                                                 |
|                                 |                                                                                                                                                                                                                                       |

SCHOLARONE™  
Manuscripts

Peer review only

**Title Page****Research article****Socioeconomic inequalities in youth smoking in Brazil**

Sandhi Maria Barreto<sup>1</sup>, Roberta Carvalho de Figueiredo<sup>1</sup>, Luana Giatti<sup>1,2</sup>

1- Postgraduate Program in Public Health, Faculty of Medicine, Universidade Federal de Minas Gerais, Belo Horizonte, Brazil

2- Department of Clinical and Social Nutrition, Universidade Federal de Ouro Preto, Ouro Preto, Brazil

**Address for correspondence:**

Prof. Sandhi M Barreto  
Faculdade de Medicina da UFMG  
Av Alfredo Balena 100, sala 814  
CEP: 30130-100  
Belo Horizonte – Minas Gerais, Brasil  
Telefax: 5531-34099016  
E-mail: sandhi.barreto@gmail.com

**Running title: Smoking among Brazilian adolescents**

**Keywords:** Smoking, Adolescence, Social determinants of health, Health behaviour

**Word****count:****2542**

## Abstract

**Objective:** The contribution of smoking to socioeconomic inequalities in health is increasing worldwide, including in Brazil. Youth smoking may play important role in the increasing social inequalities related to smoking. This study investigates social determinants of smoking among 15- to 19 year-old individuals.

**Design:** Cross-sectional study.

**Setting:** Study uses data of 3,536 participants aged 15-19 years of age of the Global Tobacco Survey (GATS) and the National Household Sample Survey (PNAD) obtained from household interviews. Smoking was defined as currently smoking tobacco products, regardless of frequency. Household socioeconomic indicators included per capita income, the educational level and sex of the head of the household, the presence of smoking restrictions and the number of smokers (excluding adolescents). Adolescent social factors included years of delaying school and social status (full-time student, working, and neither working nor studying). The hierarchical logistic regression analysis considered the effect of the complex sampling design.

**Results:** From 3,536 participants, 6.2% were smokers (95%CI: 5.4-7.1). More males than females smoked (7.2%; 5.9-8.6 vs 3.6%; 2.7-4.6). The likelihood of smoking was significantly greater for male and older teens. There was an upward trend in the OR of smoking according to the number of smokers in the house. Adolescents living in households with no smoking restrictions had a greater likelihood of being smokers. OR of smoking rose as the number of years of delaying school increased being about three times greater among adolescents who working and five times greater among those who were neither studying nor working.

1  
2  
3 **Conclusions:** Results demonstrate that socioeconomic inequality in smoking is  
4 established at younger ages and that school delay well as school abandonment may  
5 contribute to increase smoking-related inequalities. Smoking restrictions at home were  
6 protective against adolescents becoming smokers. Living with other smokers was a  
7 strong predictor of adolescents becoming smokers.  
8  
9  
10  
11  
12  
13  
14  
15  
16  
17  
18  
19  
20  
21  
22  
23  
24  
25  
26  
27  
28  
29  
30  
31  
32  
33  
34  
35  
36  
37  
38  
39  
40  
41  
42  
43  
44  
45  
46  
47  
48  
49  
50  
51  
52  
53  
54  
55  
56  
57  
58  
59  
60

## Article Summary

**Article Focus:** We investigated the social determinants of current smoking among 15- to 19-year-old Brazilian participants in the Global Tobacco Survey (GATS) Brazil. In particular, we tested whether school delay and abandonment, as well as early entry to work, which are regarded as early markers of future socioeconomic disadvantage, were associated with youth smoking.

## Key messages:

- Youth smoking is associated with delaying of school and leaving school, as well as with early entry into the work force.
- Adolescents exposed to smokers at home have a much greater chance of being a smoker than adolescents who are not.
- Smoking restrictions at home were protective against youth smoking.

## Strengths and limitations of this study:

- The main strength of this study is its analysis of the social determinants, both at the household and individual levels, of teenage smoking using a nationwide household sample in a large middle-income country.
- The main limitation is the lack of information about the relationship between adolescents and other smokers in the household.



## INTRODUCTION

Cigarette smoking has fallen sharply in Brazil; in approximately two decades, the smoking prevalence among individuals aged 18 years and older decreased 48%, from 34.8% in 1989 to 18.2% in 2008<sup>1</sup>, preventing almost 420,000 (260,000-715,000) deaths.<sup>2</sup> Such achievements have been attributed largely to Brazil's strong upstream anti-tobacco policies, combined with increased access to tobacco cessation treatments.<sup>2</sup>

However, the contribution of smoking to socioeconomic inequalities in health is increasing in Brazil. According to data from the World Health Survey, 2002-04, smoking rates were higher among poor men and women (74% and 59%, respectively), even after controlling for age, marital status, education, employment and urban/rural residence.<sup>4</sup> The results of the Global Tobacco Survey (GATS) Brazil showed that there were almost twice as many tobacco users with no or less than a year of schooling, compared to tobacco users with 11 or more years of education.<sup>5</sup>

Early initiation of tobacco use could be a key component in the increasing social inequalities of smoking and its related morbidity and mortality.<sup>6</sup> Analyses of three birth cohorts in Italy showed that the increase in smoking inequalities among both men and women was mainly due to growing inequalities in smoking initiation rates. Studies have shown that most regular adult smokers become addicted in their teens.<sup>7-9</sup> In addition, early smoking has been associated with higher levels of tobacco dependence, increased difficulty in smoking cessation and more negative health outcomes in adulthood.<sup>10-13</sup>

In 2004, approximately 70% of adult smokers residing in large Brazilian cities had begun to smoke before the age of 20 years.<sup>14</sup> However, youth smoking seems far

1  
2  
3 more frequent among socially disadvantaged groups.<sup>15,16</sup> In Brazil, among daily or  
4  
5 former daily smokers, the proportion of individuals who started smoking before 15  
6  
7 years of age was two-fold greater among those with no or less than one year of  
8  
9 schooling than among those with eight years of schooling or more.<sup>5</sup>

11 Few studies have specifically addressed the social determinants of teenage  
12  
13 smoking in Brazil,<sup>17, 18, 19</sup> and none has been undertaken in a nationwide household  
14  
15 sample. This study investigated the social determinants of current smoking among  
16  
17 participants 15 to 19 years of age in the Global Tobacco Survey (GATS) Brazil. In  
18  
19 particular, we investigated whether school delay and abandonment, as well as early  
20  
21 entry to work, which are regarded as early markers of future socioeconomic  
22  
23 disadvantage, were independently associated with smoking among teenagers.  
24  
25  
26  
27  
28

## 29 **METHODS**

### 30 **Participants**

31  
32 This study used data from the Global Tobacco Survey (GATS), which was carried out  
33  
34 in a random subsample of the National Household Sample Survey (PNAD). PNAD was  
35  
36 conducted in 2008 by the Brazilian Institute of Geography and Statistics (IBGE) and the  
37  
38 Ministry of Health. PNAD and GATS Brazil used a four-stage complex probabilistic  
39  
40 household sample (municipality, census tract, household and individual) and was  
41  
42 representative of the national and regional levels. Further details on the sampling design  
43  
44 can be found at [http://www.who.int/tobacco/surveillance/en\\_tfi\\_gats\\_2010\\_brazil.pdf](http://www.who.int/tobacco/surveillance/en_tfi_gats_2010_brazil.pdf).  
45  
46  
47  
48

49 PNAD questionnaires provided socioeconomic information about households  
50  
51 and selected individual characteristics and health related factors, and the GATS  
52  
53 questionnaire provided detailed information on tobacco use and exposure. GATS Brazil  
54  
55 aimed to include 40,000 individuals aged 15 years and older with a response rate of  
56  
57  
58  
59  
60

1  
2  
3 95.2%. Out of 39,425 interviews, 33,680 were conducted in urban areas and 5,745 in  
4  
5 rural areas. Bearing in mind our objectives, we studied all adolescents aged 15 to 19  
6  
7 years who participated in GATS Brazil, totalling 3,536 individuals.  
8  
9

## 10 11 **Variables**

12  
13  
14 The response variable of the study was current smoking, defined as being a current  
15  
16 smoker regardless of frequency, and it was grouped into two categories (yes, no). The  
17  
18 proportion of daily smokers, age at initiation and the number of cigarettes smoked per  
19  
20 day among daily smokers were used to describe smoking behaviour.  
21  
22

23 The explanatory variables were grouped into three sets of co-variables in this  
24  
25 analysis. Household socioeconomic factors included location (urban, rural), household  
26  
27 per capita income grouped in quintiles, highest education level attained by the head of  
28  
29 the household in number of years completed (0-8, 9-11, 12-14, 15 and more) and female  
30  
31 head of household (no, yes).  
32  
33

34 The second set of co-variables consisted of household smoking characteristics,  
35  
36 which included the number of smokers in the household, excluding the participating  
37  
38 adolescent (zero, one, two, three or more), and smoking restrictions at home (not  
39  
40 allowed, generally not allowed, allowed). The category “allowed” also included an  
41  
42 absence of smoking restrictions.  
43  
44

45 The last set of co-variables included the adolescents’ characteristics: sex; age  
46  
47 (15, 16, 17, 18, 19 years old); self-declared race/skin colour (white, black, brown, Asian  
48  
49 descent and indigenous); social status (full-time student, only working, working and  
50  
51 studying and neither studying/neither working); school delay, defined as the difference  
52  
53 in years of schooling between the individual’s current school grade and the school grade  
54  
55 in which he/she was expected to be given his/her age (none, one, two, three years or  
56  
57  
58  
59  
60

1  
2  
3 more). A negative difference in school delay was treated as no difference. Asian descent  
4  
5 and indigenous were combined as “other” because the number of individuals was very  
6  
7 small.  
8  
9

### 10 11 **Statistical analysis**

12  
13 First, we described the prevalence of smoking, the proportion (with 95% confidence  
14  
15 intervals) of daily smokers, age at initiation and the mean and median numbers of  
16  
17 cigarettes smoked per day by sex. Next, we performed a descriptive analysis of the  
18  
19 distribution of adolescents according to individual and household socioeconomic  
20  
21 indicators (Table 1).  
22  
23

24  
25 Associations between each explanatory variable and current smoking were  
26  
27 measured by Pearson’s chi-square test with a p-value <0.05. Variables with p<0.20 were  
28  
29 included in the multivariable analysis. The magnitude of the associations was measured  
30  
31 using odds ratios (ORs), and 95% CIs were obtained by multiple logistic regression.  
32  
33 The “svy” procedure, available in Stata, version 11.0, was used to account for the effect  
34  
35 of the GATS complex survey design. Multicollinearity among household co-variables  
36  
37 was assessed using a variance inflation factor and the condition number.  
38  
39 Multicollinearity was not found among the variables (Tables 2-3).  
40  
41  
42

43  
44 To account for the hierarchical levels of the determination of youth smoking,  
45  
46 multivariable analysis was performed, assuming that the socioeconomic household  
47  
48 factors were the most distal factors, household smoking indicators were intermediate  
49  
50 factors, and individual socioeconomic factors were the most proximal factors.<sup>20</sup> Thus,  
51  
52 after considering the sex and age of the adolescents, we began hierarchical modelling by  
53  
54 simultaneously introducing the distal variables (educational level and sex of the head of  
55  
56 the household and household per capita income), keeping the factors related to smoking  
57  
58  
59  
60

1  
2  
3 that remained statistically significant ( $p < 0.05$ ) (Model 1). Then, we entered household  
4 smoking factors (number of smokers and smoking restrictions) and kept the statistically  
5 significant factors (Model 2). Finally, we added the youth level of education and social  
6 status factors, retaining only the proximal factors that were statistically significant  
7 (Model 3). The analysis were controlled for potential confounders — in this case, the  
8 variables maintained from the previous stages. The proximal variables were adjusted for  
9 the distal and intermediate variables (Table 3).  
10  
11  
12  
13  
14  
15  
16  
17  
18  
19

## 20 RESULTS

21  
22 Among the participants, 6.2% were current smokers (95% CI: 5.4-7.1), and 5.4% (95%  
23 CI: 4.6-6.3) reported being daily smokers, with a statistically significant difference  
24 between male and female subjects (male: 7.2%; 95% CI 5.9-8.6; female: 3.6%; 95% CI  
25 2.7-4.6;  $p < 0.001$ ). All of the current smokers had smoked at least 100 cigarettes in their  
26 lifetimes. Among daily smokers, the mean (and median) numbers of cigarettes smoked  
27 per day were 11.8 (10.0), which were approximately the same in male (12.3 and [10.0])  
28 and female subjects (10.8 and [10.0]).  
29  
30  
31  
32  
33  
34  
35  
36  
37

38 The distributions of participants according to socioeconomic and household  
39 characteristics are presented in Table 1. Almost 60% of the adolescents were between  
40 17 and 19 years of age, a great majority lived in urban dwellings, half were male, and  
41 54% (95% CI: 52.3-55.7) matched the level of schooling expected for their ages (Table  
42 1). Most of the participants were full-time students at the time of the interview. In total,  
43 almost 60% of adolescents lived in households concentrated between the first (lowest)  
44 and third quintiles of income distribution, and the majority lived in houses headed by  
45 men with up to eight years of schooling and in households with smoking restrictions.  
46  
47  
48  
49  
50  
51  
52  
53  
54  
55  
56  
57  
58  
59  
60

1  
2  
3 In the univariable analysis (Table 2), male sex, older age and black skin colour  
4 were all significantly associated with a greater likelihood of being a regular smoker. The  
5 following factors in the household context were significantly associated with an  
6 increased chance of an adolescent being a current smoker: being in the fourth quintile of  
7 *per capita* income distribution and the head of the household having a lower level of  
8 education. The odds ratio of smoking increased with the number of smokers in the same  
9 household, and it was greater in homes in which smoking was allowed. The chance of  
10 smoking rose as the number of delayed years of education increased, and it was greater  
11 among adolescents who were studying and working, only working or neither studying  
12 nor working, compared to full-time students at the time of data collection.  
13  
14  
15  
16  
17  
18  
19  
20  
21  
22  
23  
24

25 In the hierarchical analysis (Table 3), exposure to tobacco smoking remained  
26 significantly lower among female subjects, although it increased with age. In the  
27 household context, the association between smoking and the educational level of the  
28 head of the household was no longer significant ( $p=0.847$ ,  $p=0.082$  and  $p=0.077$  for 9-  
29 11, 12-14 and 15 or more years of schooling, respectively). Additionally, in the  
30 household context, the OR, regarding the number of smokers in the household, for  
31 being exposed to three or more smokers was as high as 7.22 (95% CI: 3.16-16.46),  
32 demonstrating a significant upward trend ( $p<0.001$ ). Exposure to tobacco smoking  
33 remained significantly higher among adolescents living in households without smoking  
34 restrictions. After considering the effects of household socioeconomic and smoking  
35 factors, the chances of smoking remained significantly associated with the number of  
36 years of delaying of school, showing a significant upward trend ( $p<0.001$ ). The chances  
37 of smoking were about three times greater among individuals who were only working or  
38 who were working and studying, and five times higher among those who were neither  
39 studying nor working when compared to adolescents who were full-time student.  
40  
41  
42  
43  
44  
45  
46  
47  
48  
49  
50  
51  
52  
53  
54  
55  
56  
57  
58  
59  
60

## DISCUSSION

Our results confirm that school delay, as well as not attending school, and early entrance into the work force are associated with a greater likelihood of tobacco smoking among teenagers. In general, our results support the hypothesis that socioeconomic inequality in smoking is established at younger ages. In addition, our results confirm the importance of household smoking exposure in teenage smoking, reinforcing the evidence that smoking behaviour can be contagious.<sup>21, 22</sup> The findings are particularly relevant as socioeconomic disparities in smoking behaviour among youth are predictive of future disparities in smoking, as well as in morbidity and mortality from chronic diseases.<sup>23</sup>

We found important and strong associations between school engagement and smoking. The chances of smoking were substantially greater among adolescents who were no longer attending school, regardless of what they were or not working. Moreover, we also found that the chances of smoking increased as the number of years of school delay increased. School delay and leaving school are important markers of both current and future lower socioeconomic status, independent of youth health, parental education and sex.<sup>24</sup> Recently published analysis of US survey data showed that at the population level, education gaps among adult smokers are produced mostly by educational inequalities in initiation rather than in quitting smoking.<sup>25</sup>

Likely explanations for the association between school delay and school abandonment and smoking include less information on the health consequences of smoking and differences in access to and effectiveness of cessation treatments. Lower reading skills were associated with becoming a regular smoker, as well as the current

1  
2  
3 amount smoked, in a cohort analysis.<sup>26</sup> Several studies have indicated that failure to  
4  
5 complete high school is associated with substance use, including the use of tobacco.<sup>27</sup>  
6

7  
8 Educational underachievement and dropping out of school remain serious  
9  
10 problems in Brazilian society: only 50% of adolescents who enter high school will  
11  
12 graduate. In 2009, 15% of adolescents 15 to 17 years of age were not in high school.  
13  
14 Among those who were enrolled, one-third were not in the correct school grade for their  
15  
16 ages.<sup>28</sup> Researchers in the area have cited disillusion, poverty, early parenthood and  
17  
18 criminal involvement among the main reasons for this finding.<sup>28</sup>  
19

20  
21 The household environment is the most important source of cultural and social  
22  
23 values for children and adolescents, and it is the most proximal context for them.  
24  
25 Adolescents from non-smoking homes are less likely to start or develop smoking habits.  
26  
27 <sup>29</sup>Our results showed a very sharp, positive relationship between the number of smokers  
28  
29 in the household and the likelihood that a youth would smoke. There is compelling  
30  
31 evidence that children of smoking parents are more likely to initiate smoking in  
32  
33 adolescence than children of non-smoking parents, thus transmitting the single greatest  
34  
35 cause of preventable death from generation to generation.<sup>29</sup> Beyond promoting smoking,  
36  
37 exposure to other smokers at home also seemed to hamper quitting attempts and  
38  
39 smoking cessation among adolescent Chinese smokers.<sup>30</sup>  
40  
41

42  
43 Additionally, our results corroborate the growing and consistent evidence that  
44  
45 home smoking restrictions protect non-smokers from second-hand smoke as it reduces  
46  
47 smoking exposure at the household level. These results also suggest that home smoking  
48  
49 restrictions contribute to reduce youth smoking behaviour. Moreover, a completely  
50  
51 smoke-free home appears to send a stronger anti-smoking message than partial  
52  
53 restrictions, and a smoke-free home might be more influential in earlier, rather than  
54  
55 later, stages of the smoking continuum.<sup>29-33</sup> Late adolescence is a period characterised  
56  
57  
58  
59  
60



1  
2  
3 by increasing role instability and major life options, such as whether to start working,  
4  
5 go to college, leave home and so on. As adolescents approach adulthood, unhealthy  
6  
7 behaviours initiated earlier might be abandoned or could develop into more  
8  
9 consolidated attitudes. Thus, it is a crucial period to approach the promotion of health.  
10  
11 Our results support the evidence that socioeconomic inequalities in smoking begin in  
12  
13 adolescence and are likely to endure and even increase because smoking is linked to  
14  
15 school delay and abandonment, which reduce the likelihood of having a better job and  
16  
17 better life conditions in the future.  
18  
19  
20  
21  
22

### 23 **Comments and limitations**

24  
25 Unfortunately, our work lacked information about parent and adolescent peer  
26  
27 behaviours, which are known to be important risk factors for smoking. In addition, we  
28  
29 had no data on the relationship between the respondents and other smokers in the  
30  
31 household. For this reason, we cannot estimate whether smoking parents, compared to  
32  
33 other smokers, had a different impact on adolescent smoking. Despite being a cross-  
34  
35 sectional study, it is quite unlikely that youth smoking produces disadvantages at the  
36  
37 household level. It is possible however, that youth smoking is involved in youth school  
38  
39 performance in a vicious cycle: the same problems that result in school delay (or  
40  
41 abandonment) also influence smoking, and these two behaviours reinforce each other.  
42  
43 We believe that low socioeconomic status, with all that it implies (in terms of culture  
44  
45 and access to information), is the primary factor behind these behaviours.  
46  
47  
48

49  
50 The major associations observed in this study indicate that keeping teenagers at  
51  
52 school could help to prevent smoking and to reduce the health inequalities associated  
53  
54 with this habit. It is undeniable that all adolescents must be in school. However, because  
55  
56 smoking seems to be a transmissible behaviour, reducing delays in education and school  
57  
58  
59  
60

1  
2  
3 abandonment must be accompanied by reductions in smoking exposure in the home.  
4  
5 This information is important as it identifies groups where current tobacco control  
6  
7 measures are not having the desired effect.  
8  
9  
10

### 11 12 13 **Acknowledgments**

14  
15 SMB is a research fellow of the National Research Council (CNPq, grant no.  
16  
17 300159/99-4). RCF received a research grant from CNPq.  
18  
19

20  
21 SMB and LG performed the statistical analyses. All of the authors wrote the paper, and  
22  
23 they were responsible for the final content of the manuscript. All of the authors  
24  
25 contributed to the design of the research and read, edited and approved of the final draft  
26  
27 of the manuscript.  
28  
29  
30

31  
32  
33 **Funding:** None  
34

35 **Competing interests:** None  
36

37 **Ethics approval:** This study was conducted with the approval of the Brazilian National  
38  
39 Ethics Committee.  
40

41 **Data Sharing:** No similar data from this study have been previously published.  
42

43  
44 **Contributorship statement:** SMB coordinated the design, analysis and writing the  
45  
46 manuscript. LG participated in the design, analysis and in preparing the manuscript. RCF  
47  
48 participated in the design and preparation of the manuscript.  
49  
50

**Table 1** Distribution of participants according to socioeconomic and household characteristics. Brazil - 2008.

| Characteristics                                | %    | 95%CI     |
|------------------------------------------------|------|-----------|
| <b>Sex</b>                                     |      |           |
| Male                                           | 50.4 | 48.6-52.3 |
| Female                                         | 49.6 | 47.7-51.4 |
| <b>Age (years)</b>                             |      |           |
| 15-16                                          | 40.9 | 39.1-42.7 |
| 17-19                                          | 59.1 | 57.0-60.8 |
| <b>Self declared race/skin colour</b>          |      |           |
| White                                          | 44.7 | 43.1-46.4 |
| Black                                          | 6.5  | 5.6-7.4   |
| Brown                                          | 48.1 | 46.4-49.8 |
| Other                                          | 0.7  | 0.3-0.8   |
| <b>School delay (years)</b>                    |      |           |
| None                                           | 54.0 | 52.3-55.7 |
| One                                            | 12.5 | 11.3-13.7 |
| Two                                            | 10.5 | 9.3-11.5  |
| Three or more                                  | 23.0 | 21.5-24.4 |
| <b>Social Status</b>                           |      |           |
| Full student                                   | 46.3 | 44.4-48.1 |
| Only working or working and studying           | 40.2 | 38.4-42.0 |
| Neither studying/Neither working               | 13.5 | 12.2-14.7 |
| <b>Household per capita income</b>             |      |           |
| 5 <sup>0</sup> quintile (highest)              | 20.8 | 19.3-22.3 |
| 4 <sup>0</sup> quintile                        | 20.7 | 19.2-22.2 |
| 3 <sup>0</sup> quintile                        | 19.9 | 18.3-21.3 |
| 2 <sup>0</sup> quintile                        | 18.9 | 17.5-20.3 |
| 1 <sup>0</sup> quintile (lowest)               | 19.7 | 18.2-20.9 |
| <b>Head of the household schooling (years)</b> |      |           |
| 0-8                                            | 55.9 | 54.2-57.7 |
| 9-11                                           | 16.8 | 15.4-18.1 |
| 12-14                                          | 21.6 | 20.1-23.1 |

|                                |      |           |
|--------------------------------|------|-----------|
| 15+                            | 5.7  | 4.7-6.4   |
| <b>Female-headed household</b> |      |           |
| No                             | 62.2 | 64.4-63.9 |
| Yes                            | 37.8 | 36.0-39.5 |
| <b>Urban/rural dwelling</b>    |      |           |
| Urban                          | 82.9 | 81.6-84.2 |
| Rural                          | 17.1 | 15.7-18.3 |
| <b>Number of smokers</b>       |      |           |
| Zero                           | 65.5 | 63.7-67.2 |
| One                            | 25.3 | 23.6-26.8 |
| Two                            | 8.1  | 7.1-9.1   |
| Three or more                  | 1.1  | 0.7-1.5   |
| <b>Household smoking rule</b>  |      |           |
| Not allowed                    | 46.4 | 44.5-48.1 |
| Generally not allowed          | 13.3 | 12.0-14.5 |
| Allowed                        | 40.3 | 38.5-42.1 |

Source: Brazilian National Household Sample Survey (PNAD, 2008) and Global Tobacco Survey (GATS-2008)

\* Included Asian descendent and Indigenous

**Table 2** Odds Ratio (OR) of regular smoking\* according to adolescents' socio demographic features and household socioeconomic and smoking characteristics. Brazil - 2008.

| Characteristics                       | OR (95% CI)         | p Value |
|---------------------------------------|---------------------|---------|
| <b>Adolescents' characteristics</b>   |                     |         |
| <b>Sex</b>                            |                     |         |
| Male                                  | 1.00                | <0.01   |
| Female                                | 0.47 (0.33 - 0.64)  |         |
| <b>Age (years)</b>                    |                     |         |
| 15-16                                 | 1.00                | <0.01   |
| 17-19                                 | 3.77 (2.63 - 5.39)  |         |
| <b>Self declared race/skin colour</b> |                     |         |
| White                                 | 1.00                |         |
| Black                                 | 1.70 (1.05 - 2.75)  | 0.030   |
| Brown                                 | 1.02 (0.77 - 1.36)  | 0.854   |
| Other**                               | 0.65 (0.08 - 4.84)  | 0.672   |
| <b>Social Status</b>                  |                     |         |
| Full student                          | 1.00                |         |
| Only working or working and studying  | 4.73 (3.22 - 6.92)  | <0.001  |
| Neither studying/Neither working      | 6.99 (4.56 - 10.70) | <0.001  |
| <b>School delay (years)</b>           |                     |         |
| None                                  | 1.00                |         |
| One                                   | 2.33 (1.41- 3.84)   | <0.001  |
| Two                                   | 3.40 (2.11 - 5.48)  | <0.001  |
| Three or more                         | 6.56 (4.62 - 9.33)  | <0.001  |
| <b>Household characteristics</b>      |                     |         |
| <b>Urban/rural dwelling</b>           |                     |         |
| Urban                                 | 1.00                |         |
| Rural                                 | 0.80 (0.54 - 1.19)  | 0.287   |
| <b>Household per capita income</b>    |                     |         |
| 5 <sup>0</sup> quintile (highest)     | 1.00                |         |
| 4 <sup>0</sup> quintile               | 1.63 (1.05 - 2.51)  | 0.028   |
| 3 <sup>0</sup> quintile               | 1.03 (0.64 - 1.67)  | 0.314   |

|                                                |                     |        |
|------------------------------------------------|---------------------|--------|
| 2 <sup>0</sup> quintile                        | 1.23 (0.78 – 1.96)  | 0.361  |
| 1 <sup>0</sup> quintile (lowest)               | 1.46 (0.93 – 2.28)  | 0.093  |
| <b>Head of the household schooling (years)</b> |                     |        |
| 0-8                                            | 1.00                |        |
| 9-11                                           | 0.57 (0.37 - 0.88)  | 0.011  |
| 12-14                                          | 0.59 (0.40 - 0.85)  | 0.005  |
| 15+                                            | 0.58 (0.29 - 1.16)  | 0.128  |
| <b>Female-headed household</b>                 |                     |        |
| No                                             | 1.00                |        |
| Yes                                            | 1.02 (0.77 - 1.35)  | 0.855  |
| <b>Number of smokers</b>                       |                     |        |
| Zero                                           | 1.00                |        |
| One                                            | 1.93 (1.42 - 2.63)  | <0.001 |
| Two                                            | 3.00 (1.98 - 4.53)  | <0.001 |
| Three or more                                  | 9.01 (4.45 - 18.19) | <0.001 |
| <b>Household smoking rule</b>                  |                     |        |
| Not allowed                                    | 1.00                |        |
| Generally not allowed                          | 1.47 (0.93 - 2.30)  | 0.092  |
| Allowed                                        | 2.18 (1.61 - 2.94)  | <0.001 |

Source: Brazilian National Household Sample Survey (PNAD, 2008) and Global Tobacco Survey (GATS-2008)

\*Report of having smoked 100 cigarettes in lifetime and currently smoking every day or not every day.

\*\* Included Asian descendent and Indigenous

**Table 3** Results of the hierarchical regression analyses in adolescents examined the association between individual and household characteristics and smoking\*. Brazil - 2008

| Variables                                      | Model 1            | Model 2             | Model 3             |
|------------------------------------------------|--------------------|---------------------|---------------------|
| <b>Household socioeconomic factors</b>         |                    |                     |                     |
| <b>Head of the household schooling (years)</b> |                    |                     |                     |
| 0-8                                            | 1.00               | 1.00                | 1.00                |
| 9-11                                           | 0.58 (0.38 – 0.90) | 0.67 (0.43 – 0.91)  | 0.95 (0.60 – 1.51)  |
| 12-14                                          | 0.57 (0.39 – 0.83) | 0.72 (0.48 – 1.05)  | 1.45 (0.95 – 2.22)  |
| 15+                                            | 0.59 (0.29 – 1.20) | 0.75 (0.36 – 1.65)  | 1.97 (0.93 – 4.17)  |
| <b>Household smoking characteristics</b>       |                    |                     |                     |
| <b>Number of smokers</b>                       |                    |                     |                     |
| —                                              | —                  | 1.00                | 1.00                |
| One                                            | —                  | 1.68 (1.21 – 2.35)  | 1.59 (1.13 – 2.23)  |
| Two                                            | —                  | 2.60 (1.67 – 4.06)  | 2.29 (1.44 – 3.64)  |
| Three or more                                  | —                  | 7.96 (3.70 – 17.11) | 7.22 (3.16 – 16.46) |
| <b>Household smoking rule</b>                  |                    |                     |                     |
| —                                              | —                  | —                   | —                   |
| Not allowed                                    | —                  | 1.00                | 1.00                |
| Generally not allowed                          | —                  | 1.21 (0.76 – 1.94)  | 1.32 (0.82 – 2.15)  |
| Allowed                                        | —                  | 1.53 (1.10 – 2.13)  | 1.49 (1.06 – 2.09)  |
| <b>Adolescents' characteristics</b>            |                    |                     |                     |
| <b>Sex</b>                                     |                    |                     |                     |
| Male                                           | 1.00               | 1.00                | 1.00                |
| Female                                         | 0.45 (0.34 - 0.61) | 0.43 (0.33 - 0.59)  | 0.45 (0.32 – 0.62)  |
| <b>Age (years)</b>                             |                    |                     |                     |
| 15-16                                          | 1.00               | 1.00                | 1.00                |
| 17-19                                          | 3.89 (2.71 - 5.58) | 3.95 (2.74 - 5.69)  | 2.38 (1.62 – 3.49)  |
| <b>Social Status</b>                           |                    |                     |                     |
| —                                              | —                  | —                   | —                   |
| Full student                                   | —                  | —                   | 1.00                |
| Only working or working and studying           | —                  | —                   | 2.81 (1.86 – 4.25)  |
| Neither studying/Neither working               | —                  | —                   | 4.56 (2.85 – 7.30)  |
| <b>School delay (years)</b>                    |                    |                     |                     |
| —                                              | —                  | —                   | —                   |
| None                                           | —                  | —                   | 1.00                |
| One                                            | —                  | —                   | 2.34 (1.37 – 3.96)  |
| Two                                            | —                  | —                   | 2.81 (1.69 – 4.69)  |

1  
2  
3 Four or more

4.27 (2.87 – 6.35)

4 Source: Brazilian National Household Sample Survey (PNAD, 2008) and Global Tobacco Survey (GATS-2008)

5 \*Report of having smoked 100 cigarettes in lifetime and currently smoking every day or not every day.

6 All models adjusted for age, sex.  
7  
8  
9  
10  
11  
12  
13  
14  
15  
16  
17  
18  
19  
20  
21  
22  
23  
24  
25  
26  
27  
28  
29  
30  
31  
32  
33  
34  
35  
36  
37  
38  
39  
40  
41  
42  
43  
44  
45  
46  
47  
48  
49  
50  
51  
52  
53  
54  
55  
56  
57  
58  
59  
60

For peer review only



**REFERENCES**

1. WHO. [http://www.who.int/tobacco/surveillance/en\\_tfi\\_gats\\_2010\\_brazil.pdf](http://www.who.int/tobacco/surveillance/en_tfi_gats_2010_brazil.pdf). (Accessed 20 May 2013).
2. Levy D, de Almeida LM, Szklo A. The Brazil SimSmoke Policy Simulation Model: The Effect of Strong Tobacco Control Policies on Smoking Prevalence and Smoking-Attributable Deaths in a Middle Income Nation. *PLoS Med* 2012; 9: e1001336.
3. Szklo AS, de Almeida LM, Figueiredo VC, et al. A snapshot of the striking decrease in cigarette smoking prevalence in Brazil between 1989 and 2008. *Prev Med* 2012; 54: 162–67.
4. Hosseinpoor AR, Parker LA, d'Espaignet ET al. Socioeconomic Inequality in Smoking in Low-Income and Middle-Income Countries: Results from the World Health Survey. *PLoS One*. 2012; 7: e42843.
5. Instituto Nacional de Câncer (Brasil). Global adult tobacco survey Brazil 2008 / Instituto Nacional de Câncer. – Rio de Janeiro: INCA, 2010, 208 p. Available at : [http://www.who.int/tobacco/surveillance/en\\_tfi\\_gats\\_2010\\_brazil.pdf](http://www.who.int/tobacco/surveillance/en_tfi_gats_2010_brazil.pdf).
6. Federico B, Costa G, Kunst AE. Educational inequalities in initiation, cessation, and prevalence of smoking among 3 Italian birth cohorts. *Am J Public Health*. 2007;97(5):838-45.
7. Giovino GA, Mirza SA, Samet JM, et al. Tobacco use in 3 billion individuals from 16 countries: an analysis of nationally representative cross-sectional household surveys. *Lancet* 2012; 380:668-79.
8. Palipudi KM, Gupta PC, Sinha DN, et al. Social determinants of health and tobacco use in thirteen low and middle income countries: evidence from Global Adult Tobacco Survey. *PLoS One* 2012; 7: e33466.

- 1  
2  
3 9. Moolchan ET, Ernst M, Henningfield JE. A review of tobacco smoking in  
4 adolescents: treatment implications. *J Am Acad Child Adolesc Psychiatry* 2000; 39:682-  
5 93.  
6  
7  
8  
9  
10 10. Park S, Lee JY, Song TM et al. Age-associated changes in nicotine dependence.  
11 *Publ. Health* 2012; 126: 482–89.  
12  
13  
14 11. Greenwood PA, Engels RC, Olsson CA, ET AL. Patterns of adolescent smoking and  
15 later nicotine dependence in young adults: a 10-year prospective study. *Public*  
16 *Health* 2010; 124:65-70.  
17  
18  
19  
20  
21 12. O’Loughlin J, DiFranza J, Tyndale RF et al. Nicotine-dependence symptoms are  
22 associated with smoking frequency in adolescents. *Am J Prev Med* 2003; 25: 219–25.  
23  
24  
25 13. Riggs NR, Chou CP, Li CY, et al. Adolescent to emerging adulthood smoking  
26 trajectories: when do smoking trajectories diverge, and do they predict early adulthood  
27 nicotine dependence? *Nicotine Tob Res* 2007; 9:1147–54.  
28  
29  
30  
31  
32 14. Household survey on behaviour risk factors and self-reported non-communicable  
33 diseases. Rio de Janeiro: National Cancer Institute, Health Surveillance Division,  
34 Ministry of Health; 2004.  
35  
36  
37  
38 15. Goldade K, Choi K, Bernat DH, et al. Multilevel predictors of smoking initiation  
39 among adolescents: findings from the Minnesota Adolescent Community Cohort  
40 (MACC) study. *Prev Med* 2012; 54:242-6.  
41  
42  
43  
44  
45 16. Tjora T, Hetland J, Aarø LE, et al. Distal and proximal family predictors of  
46 adolescents' smoking initiation and development: A longitudinal latent curve model  
47 analysis *BMC Public Health* 2011; 11:911.  
48  
49  
50  
51  
52 17. Hallal PC, Clark VL, Assunção MC, ET AL. Socioeconomic trajectories from birth  
53 to adolescence and risk factors for noncommunicable disease: prospective analyses. *J*  
54 *Adolesc Health* 2012; 51(6 Suppl):S32-S7  
55  
56  
57  
58  
59  
60

- 1  
2  
3 18. Barreto SM, Giatti L, Casado L, et al. Contextual factors associated  
4 with smoking among Brazilian adolescents. *J Epidemiol Community Health* 2012; 66:  
5 723–29.  
6  
7  
8  
9  
10 19. Sanchez ZM, Opaleye ES, Martins SS, et AL. Adolescent gender differences in the  
11 determinants of tobacco smoking: a cross sectional survey among high school students  
12 in São Paulo. *BMC Public Health* 2010; 10: 748.  
13  
14  
15  
16 20. Victora CG, Huttly SR, Fuchs SC, et al. The role of conceptual frameworks in  
17 epidemiological analysis: a hierarchical approach. *Int J Epidemiol* 1997; 26:224-7.  
18  
19  
20  
21 21. Schuck K, Otten R, Engels RC, et AL. Birectional influences between parents and  
22 children in smoking behavior: a longitudinal full-family model. *Nicotine Tob Res* 2013;  
23 15:44-51.  
24  
25  
26  
27 22. Christakis NA, Fowler JH. Social contagion theory: examining  
28 dynamic social networks and human behavior. *Stat Med* 2013; 32:556-77.  
29  
30  
31  
32 23. Wardle J, Jarvis MJ, Steggle N, et al. Socioeconomic disparities in cancer-  
33 risk behaviors in adolescence: baseline results from the Health and  
34 Behaviour in Teenagers Study (HABITS). *Prev Med* 2003;36:721-30.  
35  
36  
37  
38 24. De Ridder KA, Pape K, Johnsen R, et al. School dropout: a major public health  
39 challenge: a 10-year prospective study on medical and non-medical social insurance  
40 benefits in young adulthood, the Young-HUNT 1 Study (Norway). *J Epidemiol*  
41 *Community Health* 2012; 66:995-1000.  
42  
43  
44  
45  
46  
47 25. Maralani V. Educational inequalities in smoking: the role of initiation versus  
48 quitting. *Soc Sci Med*. 2013;84:129-37  
49  
50  
51  
52 26. Martin LT, Haas A, Schonlau M, et al. Which literacy skills are associated with  
53 smoking? *J Epidemiol Community Health* 2012; 66:189-92.  
54  
55  
56  
57  
58  
59  
60

1  
2  
3 27. Henry KL ,Knight KE, Thornberry TP. School disengagement as a predictor of  
4 dropout, delinquency, and problem substance use during adolescence and early  
5 adulthood. *J Youth Adolesc* 2012; 41:156-66.  
6  
7

8  
9 28. IPEA  
10 [http://www.ipea.gov.br/portal/index.php?option=com\\_content&view=article&id=15818](http://www.ipea.gov.br/portal/index.php?option=com_content&view=article&id=15818)  
11 &catid=159&Itemid=75. (accessed 15 Feb 2013)  
12  
13  
14

15  
16 29. Gilman SE, Rende R, Boergers J, et al. Parental smoking and adolescent smoking  
17 initiation: an intergenerational perspective on tobacco control. *Pediatrics* 2009; 123:  
18 e274-8.  
19  
20  
21

22  
23 30. Wang MP, Ho SY, Lo WS, et al. Smoking Family, Second-hand Smoke Exposure at  
24 Home, and Quitting in Adolescent Smokers. *Nicotine Tob Res* 2012; [Epub ahead of  
25 print].  
26  
27  
28

29  
30 31. Emory K, Saquib N, Gilpin EA, et al. The association between  
31 home smoking restrictions and youth smoking behaviour: a review. *Tob Control* 2010;  
32 19:495-506.  
33  
34  
35

36  
37 32. Fichtenberg CM, Glantz SA. Effect of smoke-free workplaces on smoking  
38 behaviour: systematic review. *Br Med J* 2002;325:188.  
39  
40

41  
42 33. Mills AL, Messer K, Gilpin E, et al. The effect of smoke-free homes on adult  
43 smoking behavior: a review. *Nicotine Tob Res* 2009;11:1131-41.  
44  
45  
46  
47  
48  
49  
50  
51  
52  
53  
54  
55  
56  
57  
58  
59  
60

**Title Page****Research article****Socioeconomic inequalities in youth smoking in Brazil**

Sandhi Maria Barreto<sup>1</sup>, Roberta Carvalho de Figueiredo<sup>1</sup>, Luana Giatti<sup>1,2</sup>

1- Postgraduate Program in Public Health, Faculty of Medicine, Universidade Federal de Minas Gerais, Belo Horizonte, Brazil

2- Department of Clinical and Social Nutrition, Universidade Federal de Ouro Preto, Ouro Preto, Brazil

**Address for correspondence:**

Prof. Sandhi M Barreto  
Faculdade de Medicina da UFMG  
Av Alfredo Balena 100, sala 814  
CEP: 30130-100  
Belo Horizonte – Minas Gerais, Brasil  
Telefax: 5531-34099016  
E-mail: sandhi.barreto@gmail.com

**Running title: Smoking among Brazilian adolescents**

**Keywords:** Smoking, Adolescence, Social determinants of health, Health behaviour

**Word****count:****2542**

## Abstract

**Objective:** The contribution of smoking to socioeconomic inequalities in health is increasing worldwide, including in Brazil. Youth smoking may play important role in the increasing social inequalities related to smoking. This study investigates social determinants of smoking among 15- to 19 year-old individuals.

**Design:** Cross-sectional study.

**Setting:** Study uses data of 3,536 participants aged 15-19 years of age of the Global Tobacco Survey (GATS) and the National Household Sample Survey (PNAD) obtained from household interviews. Smoking was defined as currently smoking tobacco products, regardless of frequency. Household socioeconomic indicators included per capita income, the educational level and sex of the head of the household, the presence of smoking restrictions and the number of smokers (excluding adolescents). Adolescent social factors included years of delaying school and social status (full-time student, working, and neither working nor studying). The hierarchical logistic regression analysis considered the effect of the complex sampling design.

**Results:** From 3,536 participants, 6.2% were smokers (95%CI: 5.4-7.1). More males than females smoked (7.2%; 5.9-8.6 vs 3.6%; 2.7-4.6). The likelihood of smoking was significantly greater for male and older teens. There was an upward trend in the OR of smoking according to the number of smokers in the house. Adolescents living in households with no smoking restrictions had a greater likelihood of being smokers. OR of smoking rose as the number of years of delaying school increased being about three times greater among adolescents who working and five times greater among those who were neither studying nor working.

1  
2  
3 **Conclusions:** Results demonstrate that socioeconomic inequality in smoking is  
4 established at younger ages and that school delay well as school abandonment may  
5 contribute to increase smoking-related inequalities. Smoking restrictions at home were  
6 protective against adolescents becoming smokers. Living with other smokers was a  
7 strong predictor of adolescents becoming smokers.  
8  
9  
10  
11  
12  
13  
14  
15  
16  
17  
18  
19  
20  
21  
22  
23  
24  
25  
26  
27  
28  
29  
30  
31  
32  
33  
34  
35  
36  
37  
38  
39  
40  
41  
42  
43  
44  
45  
46  
47  
48  
49  
50  
51  
52  
53  
54  
55  
56  
57  
58  
59  
60

## Article Summary

**Article Focus:** We investigated the social determinants of current smoking among 15- to 19-year-old Brazilian participants in the Global Tobacco Survey (GATS) Brazil. In particular, we tested whether **school delay and abandonment**, as well as early entry to work, which are regarded as early markers of future socioeconomic disadvantage, were associated with youth smoking.

## Key messages:

- Youth smoking is associated with delaying of school and leaving school, as well as with early entry into the work force.
- Adolescents exposed to smokers at home have a much greater chance of being a smoker than adolescents who are not.
- Smoking restrictions at home were protective against youth smoking.

## Strengths and limitations of this study:

- The main strength of this study is its analysis of the social determinants, both at the household and individual levels, of teenage smoking using a nationwide household sample in a large middle-income country.
- The main limitation is the lack of information about the relationship between adolescents and other smokers in the household.



## INTRODUCTION

Cigarette smoking has fallen sharply in Brazil; in approximately two decades, the smoking prevalence among individuals aged 18 years and older decreased 48%, from 34.8% in 1989 to 18.2% in 2008<sup>1</sup>, preventing almost 420,000 (260,000-715,000) deaths.<sup>2</sup> Such achievements have been attributed largely to Brazil's strong upstream anti-tobacco policies, combined with increased access to tobacco cessation treatments.<sup>2</sup>

However, the contribution of smoking to socioeconomic inequalities in health is increasing in Brazil. According to data from the World Health Survey, 2002-04, smoking rates were higher among poor men and women (74% and 59%, respectively), even after controlling for age, marital status, education, employment and urban/rural residence.<sup>4</sup> The results of the Global Tobacco Survey (GATS) Brazil showed that there were almost twice as many tobacco users with no or less than a year of schooling, compared to tobacco users with 11 or more years of education.<sup>5</sup>

Early initiation of tobacco use could be a key component in the increasing social inequalities of smoking and its related morbidity and mortality.<sup>6</sup> Analyses of three birth cohorts in Italy showed that the increase in smoking inequalities among both men and women was mainly due to growing inequalities in smoking initiation rates. Studies have shown that most regular adult smokers become addicted in their teens.<sup>7-9</sup> In addition, early smoking has been associated with higher levels of tobacco dependence, increased difficulty in smoking cessation and more negative health outcomes in adulthood.<sup>10-13</sup>

In 2004, approximately 70% of adult smokers residing in large Brazilian cities had begun to smoke before the age of 20 years.<sup>14</sup> However, youth smoking seems far

1  
2  
3 more frequent among socially disadvantaged groups.<sup>15,16</sup> In Brazil, among daily or  
4  
5 former daily smokers, the proportion of individuals who started smoking before 15  
6  
7 years of age was two-fold greater among those with no or less than one year of  
8  
9 schooling than among those with eight years of schooling or more.<sup>5</sup>  
10

11  
12 Few studies have specifically addressed the social determinants of teenage  
13  
14 smoking in Brazil,<sup>17, 18, 19</sup> and none has been undertaken in a nationwide household  
15  
16 sample. This study investigated the social determinants of current smoking among  
17  
18 participants 15 to 19 years of age in the Global Tobacco Survey (GATS) Brazil. In  
19  
20 particular, we investigated whether **school delay and abandonment**, as well as early  
21  
22 entry to work, which are regarded as early markers of future socioeconomic  
23  
24 disadvantage, were independently associated with smoking among teenagers.  
25  
26  
27  
28

## 29 30 **METHODS**

### 31 32 **Participants**

33  
34 This study used data from the Global Tobacco Survey (GATS), **which was carried out**  
35  
36 **in a random subsample of** the National Household Sample Survey (PNAD). **PNAD was**  
37  
38 **conducted in 2008** by the Brazilian Institute of Geography and Statistics (IBGE) and the  
39  
40 Ministry of Health. PNAD and GATS Brazil used a four-stage complex probabilistic  
41  
42 household sample (municipality, census tract, household and individual) and was  
43  
44 representative of the national and regional levels. Further details on the sampling design  
45  
46 can be found at [http://www.who.int/tobacco/surveillance/en\\_tfi\\_gats\\_2010\\_brazil.pdf](http://www.who.int/tobacco/surveillance/en_tfi_gats_2010_brazil.pdf).  
47  
48

49  
50 **PNAD questionnaires provided** socioeconomic information about households  
51  
52 and selected individual characteristics and health related factors, and **the GATS**  
53  
54 **questionnaire provided** detailed information on tobacco use and exposure. GATS Brazil  
55  
56 aimed to include 40,000 individuals aged 15 years and older with a response rate of  
57  
58  
59  
60

1  
2  
3 95.2%. Out of 39,425 interviews, 33,680 were conducted in urban areas and 5,745 in  
4  
5 rural areas. Bearing in mind our objectives, we studied all adolescents aged 15 to 19  
6  
7 years who participated in GATS Brazil, totalling 3,536 individuals.  
8  
9

## 10 11 **Variables**

12  
13  
14 The response variable of the study was current smoking, defined as being a current  
15  
16 smoker regardless of frequency, and it was grouped into two categories (yes, no). The  
17  
18 proportion of daily smokers, age at initiation and the number of cigarettes smoked per  
19  
20 day among daily smokers were used to describe smoking behaviour.  
21  
22

23 The explanatory variables were grouped into three sets of co-variables in this  
24  
25 analysis. Household socioeconomic factors included location (urban, rural), household  
26  
27 per capita income grouped in quintiles, highest education level attained by the head of  
28  
29 the household in number of years completed (0-8, 9-11, 12-14, 15 and more) and female  
30  
31 head of household (no, yes).  
32  
33

34 The second set of co-variables consisted of household smoking characteristics,  
35  
36 which included the number of smokers in the household, excluding the participating  
37  
38 adolescent (zero, one, two, three or more), and smoking restrictions at home (not  
39  
40 allowed, generally not allowed, allowed). The category “allowed” also included an  
41  
42 absence of smoking restrictions.  
43  
44

45 The last set of co-variables included the adolescents’ characteristics: sex; age  
46  
47 (15, 16, 17, 18, 19 years old); self-declared race/skin colour (white, black, brown, Asian  
48  
49 descent and indigenous); social status (full-time student, only working, working and  
50  
51 studying and neither studying/neither working); school delay, defined as the difference  
52  
53 in years of schooling between the individual’s current school grade and the school grade  
54  
55 in which he/she was expected to be given his/her age (none, one, two, three years or  
56  
57  
58  
59  
60

1  
2  
3 more). A negative difference in school delay was treated as no difference. Asian descent  
4  
5 and indigenous were combined as “other” because the number of individuals was very  
6  
7 small.  
8  
9

### 10 11 **Statistical analysis**

12  
13 First, we described the prevalence of smoking, the proportion (with 95% confidence  
14  
15 intervals) of daily smokers, age at initiation and the mean and median numbers of  
16  
17 cigarettes smoked per day by sex. Next, we performed a descriptive analysis of the  
18  
19 distribution of adolescents according to individual and household socioeconomic  
20  
21 indicators (Table 1).  
22  
23

24  
25 Associations between each explanatory variable and current smoking were  
26  
27 measured by Pearson’s chi-square test with a p-value <0.05. Variables with p<0.20 were  
28  
29 included in the multivariable analysis. The magnitude of the associations was measured  
30  
31 using odds ratios (ORs), and 95% CIs were obtained by multiple logistic regression.  
32  
33 The “svy” procedure, available in Stata, version 11.0, was used to account for the effect  
34  
35 of the GATS complex survey design. Multicollinearity among household co-variables  
36  
37 was assessed using a variance inflation factor and the condition number.  
38  
39 Multicollinearity was not found among the variables (Tables 2-3).  
40  
41  
42

43  
44 To account for the hierarchical levels of the determination of youth smoking,  
45  
46 multivariable analysis was performed, assuming that the socioeconomic household  
47  
48 factors were the most distal factors, household smoking indicators were intermediate  
49  
50 factors, and individual socioeconomic factors were the most proximal factors.<sup>20</sup> Thus,  
51  
52 after considering the sex and age of the adolescents, we began hierarchical modelling by  
53  
54 simultaneously introducing the distal variables (educational level and sex of the head of  
55  
56 the household and household per capita income), keeping the factors related to smoking  
57  
58  
59  
60

1  
2  
3 that remained statistically significant ( $p < 0.05$ ) (Model 1). Then, we entered household  
4 smoking factors (number of smokers and smoking restrictions) and kept the statistically  
5 significant factors (Model 2). Finally, we added the youth level of education and social  
6 status factors, retaining only the proximal factors that were statistically significant  
7 (Model 3). The analysis were controlled for potential confounders — in this case, the  
8 variables maintained from the previous stages. The proximal variables were adjusted for  
9 the distal and intermediate variables (Table 3).  
10  
11  
12  
13  
14  
15  
16  
17  
18  
19

## 20 RESULTS

21  
22 Among the participants, 6.2% were current smokers (95% CI: 5.4-7.1), and 5.4% (95%  
23 CI: 4.6-6.3) reported being daily smokers, with a statistically significant difference  
24 between male and female subjects (male: 7.2%; 95% CI 5.9-8.6; female: 3.6%; 95% CI  
25 2.7-4.6;  $p < 0.001$ ). All of the current smokers had smoked at least 100 cigarettes in their  
26 lifetimes. Among daily smokers, the mean (and median) numbers of cigarettes smoked  
27 per day were 11.8 (10.0), which were approximately the same in male (12.3 and [10.0])  
28 and female subjects (10.8 and [10.0]).  
29  
30  
31  
32  
33  
34  
35  
36  
37

38 The distributions of participants according to socioeconomic and household  
39 characteristics are presented in Table 1. Almost 60% of the adolescents were between  
40 17 and 19 years of age, a great majority lived in urban dwellings, half were male, and  
41 54% (95% CI: 52.3-55.7) matched the level of schooling expected for their ages (Table  
42 1). Most of the participants were full-time students at the time of the interview. In total,  
43 almost 60% of adolescents lived in households concentrated between the first (lowest)  
44 and third quintiles of income distribution, and the majority lived in houses headed by  
45 men with up to eight years of schooling and in households with smoking restrictions.  
46  
47  
48  
49  
50  
51  
52  
53  
54  
55  
56  
57  
58  
59  
60

1  
2  
3 In the univariable analysis (Table 2), male sex, older age and black skin colour  
4 were all significantly associated with a greater likelihood of being a regular smoker. The  
5 following factors in the household context were significantly associated with an  
6 increased chance of an adolescent being a current smoker: being in the fourth quintile of  
7 *per capita* income distribution and the head of the household having a lower level of  
8 education. The odds ratio of smoking increased with the number of smokers in the same  
9 household, and it was greater in homes in which smoking was allowed. The chance of  
10 smoking rose as the number of delayed years of education increased, and it was greater  
11 among adolescents who were studying and working, only working or neither studying  
12 nor working, compared to full-time students at the time of data collection.  
13  
14  
15  
16  
17  
18  
19  
20  
21  
22  
23  
24

25 In the hierarchical analysis (Table 3), exposure to tobacco smoking remained  
26 significantly lower among female subjects, although it increased with age. In the  
27 household context, the association between smoking and the educational level of the  
28 head of the household was no longer significant ( $p=0.847$ ,  $p=0.082$  and  $p=0.077$  for 9-  
29 11, 12-14 and 15 or more years of schooling, respectively). Additionally, in the  
30 household context, the OR, regarding the number of smokers in the household, for  
31 being exposed to three or more smokers was as high as 7.22 (95% CI: 3.16-16.46),  
32 demonstrating a significant upward trend ( $p<0.001$ ). Exposure to tobacco smoking  
33 remained significantly higher among adolescents living in households *without* smoking  
34 restrictions. After considering the effects of household socioeconomic and smoking  
35 factors, the chances of smoking remained significantly associated with the number of  
36 years of delaying of school, showing a significant upward trend ( $p<0.001$ ). *The chances*  
37 *of smoking were about three times greater among individuals who were only working or*  
38 *who were working and studying, and five times higher among those who were neither*  
39 *studying nor working when compared to adolescents who were full-time student.*  
40  
41  
42  
43  
44  
45  
46  
47  
48  
49  
50  
51  
52  
53  
54  
55  
56  
57  
58  
59  
60

## DISCUSSION

Our results confirm that school delay, as well as not attending school, and early entrance into the work force are associated with a greater likelihood of tobacco smoking among teenagers. In general, our results support the hypothesis that socioeconomic inequality in smoking is established at younger ages. In addition, our results confirm the importance of household smoking exposure in teenage smoking, reinforcing the evidence that smoking behaviour can be contagious.<sup>21, 22</sup> The findings are particularly relevant as socioeconomic disparities in smoking behaviour among youth are predictive of future disparities in smoking, as well as in morbidity and mortality from chronic diseases.<sup>23</sup>

We found important and strong associations between school engagement and smoking. The chances of smoking were substantially greater among adolescents who were no longer attending school, regardless of what they were or not working. Moreover, we also found that the chances of smoking increased as the number of years of school delay increased. School delay and leaving school are important markers of both current and future lower socioeconomic status, independent of youth health, parental education and sex.<sup>24</sup> Recently published analysis of US survey data showed that at the population level, education gaps among adult smokers are produced mostly by educational inequalities in initiation rather than in quitting smoking.<sup>25</sup>

Likely explanations for the association between school delay and school abandonment and smoking include less information on the health consequences of smoking and differences in access to and effectiveness of cessation treatments. Lower reading skills were associated with becoming a regular smoker, as well as the current

1  
2  
3 amount smoked, in a cohort analysis.<sup>26</sup> Several studies have indicated that failure to  
4  
5 complete high school is associated with substance use, including the use of tobacco.<sup>27</sup>  
6

7  
8 Educational underachievement and dropping out of school remain serious  
9  
10 problems in Brazilian society: only 50% of adolescents who enter high school will  
11  
12 graduate. In 2009, 15% of adolescents 15 to 17 years of age were not in high school.  
13  
14 Among those who were enrolled, one-third were not in the correct school grade for their  
15  
16 ages.<sup>28</sup> Researchers in the area have cited disillusion, poverty, early parenthood and  
17  
18 criminal involvement among the main reasons for this finding.<sup>28</sup>  
19

20  
21 The household environment is the most important source of cultural and social  
22  
23 values for children and adolescents, and it is the most proximal context for them.  
24  
25 Adolescents from non-smoking homes are less likely to start or develop smoking habits.  
26  
27 <sup>29</sup>Our results showed a very sharp, positive relationship between the number of smokers  
28  
29 in the household and the likelihood that a youth would smoke. There is compelling  
30  
31 evidence that children of smoking parents are more likely to initiate smoking in  
32  
33 adolescence than children of non-smoking parents, thus transmitting the single greatest  
34  
35 cause of preventable death from generation to generation.<sup>29</sup> Beyond promoting smoking,  
36  
37 exposure to other smokers at home also seemed to hamper quitting attempts and  
38  
39 smoking cessation among adolescent Chinese smokers.<sup>30</sup>  
40  
41

42  
43 Additionally, our results corroborate the growing and consistent evidence that  
44  
45 home smoking restrictions protect non-smokers from second-hand smoke **as it reduces**  
46  
47 **smoking exposure at the household level**. These results also suggest that **home smoking**  
48  
49 **restrictions contribute to reduce youth smoking behaviour**. Moreover, a completely  
50  
51 smoke-free home appears to send a stronger anti-smoking message than partial  
52  
53 restrictions, and a smoke-free home might be more influential in earlier, rather than  
54  
55 later, stages of the smoking continuum.<sup>29-33</sup> Late adolescence is a period characterised  
56  
57  
58  
59  
60



1  
2  
3 by increasing role instability and major life options, such as whether to start working,  
4  
5 go to college, leave home and so on. As adolescents approach adulthood, unhealthy  
6  
7 behaviours initiated earlier might be abandoned or could develop into more  
8  
9 consolidated attitudes. Thus, it is a crucial period to approach the promotion of health.  
10  
11 Our results support the evidence that socioeconomic inequalities in smoking begin in  
12  
13 adolescence and are likely to endure and even increase because smoking is linked to  
14  
15 school delay and abandonment, which reduce the likelihood of having a better job and  
16  
17 better life conditions in the future.  
18  
19  
20  
21  
22

### 23 **Comments and limitations**

24  
25 Unfortunately, our work lacked information about parent and adolescent peer  
26  
27 behaviours, which are known to be important risk factors for smoking. In addition, we  
28  
29 had no data on the relationship between the respondents and other smokers in the  
30  
31 household. For this reason, we cannot estimate whether smoking parents, compared to  
32  
33 other smokers, had a different impact on adolescent smoking. Despite being a cross-  
34  
35 sectional study, it is quite unlikely that youth smoking produces disadvantages at the  
36  
37 household level. It is possible however, that youth smoking is involved in youth school  
38  
39 performance in a vicious cycle: the same problems that result in school delay (or  
40  
41 abandonment) also influence smoking, and these two behaviours reinforce each other.  
42  
43 We believe that low socioeconomic status, with all that it implies (in terms of culture  
44  
45 and access to information), is the primary factor behind these behaviours.  
46  
47  
48

49  
50 The major associations observed in this study indicate that keeping teenagers at  
51  
52 school could help to prevent smoking and to reduce the health inequalities associated  
53  
54 with this habit. It is undeniable that all adolescents must be in school. However, because  
55  
56 smoking seems to be a transmissible behaviour, reducing delays in education and school  
57  
58  
59  
60

1  
2  
3 abandonment must be accompanied by reductions in smoking exposure in the home.  
4  
5 This information is important as it identifies groups where current tobacco control  
6  
7 measures are not having the desired effect.  
8  
9  
10

### 11 12 13 **Acknowledgments**

14  
15 SMB is a research fellow of the National Research Council (CNPq, grant no.  
16  
17 300159/99-4). RCF received a research grant from CNPq.  
18  
19

20  
21 SMB and LG performed the statistical analyses. All of the authors wrote the paper, and  
22  
23 they were responsible for the final content of the manuscript. All of the authors  
24  
25 contributed to the design of the research and read, edited and approved of the final draft  
26  
27 of the manuscript.  
28  
29

30  
31  
32  
33 **Funding:** None

34  
35 **Competing interests:** None

36  
37 **Ethics approval:** This study was conducted with the approval of the Brazilian National  
38  
39 Ethics Committee.

40  
41 **Data Sharing:** No similar data from this study have been previously published.  
42  
43  
44  
45  
46  
47  
48  
49  
50  
51  
52  
53  
54  
55  
56  
57  
58  
59  
60

**Table 1** Distribution of participants according to socioeconomic and household characteristics. Brazil - 2008.

| Characteristics                                | %    | 95%CI     |
|------------------------------------------------|------|-----------|
| <b>Sex</b>                                     |      |           |
| Male                                           | 50.4 | 48.6-52.3 |
| Female                                         | 49.6 | 47.7-51.4 |
| <b>Age (years)</b>                             |      |           |
| 15-16                                          | 40.9 | 39.1-42.7 |
| 17-19                                          | 59.1 | 57.0-60.8 |
| <b>Self declared race/skin colour</b>          |      |           |
| White                                          | 44.7 | 43.1-46.4 |
| Black                                          | 6.5  | 5.6-7.4   |
| Brown                                          | 48.1 | 46.4-49.8 |
| Other                                          | 0.7  | 0.3-0.8   |
| <b>School delay (years)</b>                    |      |           |
| None                                           | 54.0 | 52.3-55.7 |
| One                                            | 12.5 | 11.3-13.7 |
| Two                                            | 10.5 | 9.3-11.5  |
| Three or more                                  | 23.0 | 21.5-24.4 |
| <b>Social Status</b>                           |      |           |
| Full student                                   | 46.3 | 44.4-48.1 |
| Only working or working and studying           | 40.2 | 38.4-42.0 |
| Neither studying/Neither working               | 13.5 | 12.2-14.7 |
| <b>Household per capita income</b>             |      |           |
| 5 <sup>0</sup> quintile (highest)              | 20.8 | 19.3-22.3 |
| 4 <sup>0</sup> quintile                        | 20.7 | 19.2-22.2 |
| 3 <sup>0</sup> quintile                        | 19.9 | 18.3-21.3 |
| 2 <sup>0</sup> quintile                        | 18.9 | 17.5-20.3 |
| 1 <sup>0</sup> quintile (lowest)               | 19.7 | 18.2-20.9 |
| <b>Head of the household schooling (years)</b> |      |           |
| 0-8                                            | 55.9 | 54.2-57.7 |
| 9-11                                           | 16.8 | 15.4-18.1 |
| 12-14                                          | 21.6 | 20.1-23.1 |

|                                |      |           |
|--------------------------------|------|-----------|
| 15+                            | 5.7  | 4.7-6.4   |
| <b>Female-headed household</b> |      |           |
| No                             | 62.2 | 64.4-63.9 |
| Yes                            | 37.8 | 36.0-39.5 |
| <b>Urban/rural dwelling</b>    |      |           |
| Urban                          | 82.9 | 81.6-84.2 |
| Rural                          | 17.1 | 15.7-18.3 |
| <b>Number of smokers</b>       |      |           |
| Zero                           | 65.5 | 63.7-67.2 |
| One                            | 25.3 | 23.6-26.8 |
| Two                            | 8.1  | 7.1-9.1   |
| Three or more                  | 1.1  | 0.7-1.5   |
| <b>Household smoking rule</b>  |      |           |
| Not allowed                    | 46.4 | 44.5-48.1 |
| Generally not allowed          | 13.3 | 12.0-14.5 |
| Allowed                        | 40.3 | 38.5-42.1 |

Source: Brazilian National Household Sample Survey (PNAD, 2008) and Global Tobacco Survey (GATS-2008)

\* Included Asian descendent and Indigenous

**Table 2** Odds Ratio (OR) of regular smoking\* according to adolescents' socio demographic features and household socioeconomic and smoking characteristics. Brazil - 2008.

| Characteristics                       | OR (95% CI)         | p Value |
|---------------------------------------|---------------------|---------|
| <b>Adolescents' characteristics</b>   |                     |         |
| <b>Sex</b>                            |                     |         |
| Male                                  | 1.00                | <0.01   |
| Female                                | 0.47 (0.33 - 0.64)  |         |
| <b>Age (years)</b>                    |                     |         |
| 15-16                                 | 1.00                | <0.01   |
| 17-19                                 | 3.77 (2.63 - 5.39)  |         |
| <b>Self declared race/skin colour</b> |                     |         |
| White                                 | 1.00                |         |
| Black                                 | 1.70 (1.05 - 2.75)  | 0.030   |
| Brown                                 | 1.02 (0.77 - 1.36)  | 0.854   |
| Other**                               | 0.65 (0.08 - 4.84)  | 0.672   |
| <b>Social Status</b>                  |                     |         |
| Full student                          | 1.00                |         |
| Only working or working and studying  | 4.73 (3.22 - 6.92)  | <0.001  |
| Neither studying/Neither working      | 6.99 (4.56 - 10.70) | <0.001  |
| <b>School delay (years)</b>           |                     |         |
| None                                  | 1.00                |         |
| One                                   | 2.33 (1.41 - 3.84)  | <0.001  |
| Two                                   | 3.40 (2.11 - 5.48)  | <0.001  |
| Three or more                         | 6.56 (4.62 - 9.33)  | <0.001  |
| <b>Household characteristics</b>      |                     |         |
| <b>Urban/rural dwelling</b>           |                     |         |
| Urban                                 | 1.00                |         |
| Rural                                 | 0.80 (0.54 - 1.19)  | 0.287   |
| <b>Household per capita income</b>    |                     |         |
| 5 <sup>0</sup> quintile (highest)     | 1.00                |         |
| 4 <sup>0</sup> quintile               | 1.63 (1.05 - 2.51)  | 0.028   |
| 3 <sup>0</sup> quintile               | 1.03 (0.64 - 1.67)  | 0.314   |

|                                                |                     |        |
|------------------------------------------------|---------------------|--------|
| 2 <sup>0</sup> quintile                        | 1.23 (0.78 – 1.96)  | 0.361  |
| 1 <sup>0</sup> quintile (lowest)               | 1.46 (0.93 – 2.28)  | 0.093  |
| <b>Head of the household schooling (years)</b> |                     |        |
| 0-8                                            | 1.00                |        |
| 9-11                                           | 0.57 (0.37 - 0.88)  | 0.011  |
| 12-14                                          | 0.59 (0.40 - 0.85)  | 0.005  |
| 15+                                            | 0.58 (0.29 - 1.16)  | 0.128  |
| <b>Female-headed household</b>                 |                     |        |
| No                                             | 1.00                |        |
| Yes                                            | 1.02 (0.77 - 1.35)  | 0.855  |
| <b>Number of smokers</b>                       |                     |        |
| Zero                                           | 1.00                |        |
| One                                            | 1.93 (1.42 - 2.63)  | <0.001 |
| Two                                            | 3.00 (1.98 - 4.53)  | <0.001 |
| Three or more                                  | 9.01 (4.45 - 18.19) | <0.001 |
| <b>Household smoking rule</b>                  |                     |        |
| Not allowed                                    | 1.00                |        |
| Generally not allowed                          | 1.47 (0.93 - 2.30)  | 0.092  |
| Allowed                                        | 2.18 (1.61 - 2.94)  | <0.001 |

Source: Brazilian National Household Sample Survey (PNAD, 2008) and Global Tobacco Survey (GATS-2008)

\*Report of having smoked 100 cigarettes in lifetime and currently smoking every day or not every day.

\*\* Included Asian descendent and Indigenous

**Table 3** Results of the hierarchical regression analyses in adolescents examined the association between individual and household characteristics and smoking\*. Brazil - 2008

| Variables                                      | Model 1            | Model 2             | Model 3             |
|------------------------------------------------|--------------------|---------------------|---------------------|
| <b>Household socioeconomic factors</b>         |                    |                     |                     |
| <b>Head of the household schooling (years)</b> |                    |                     |                     |
| 0-8                                            | 1.00               | 1.00                | 1.00                |
| 9-11                                           | 0.58 (0.38 – 0.90) | 0.67 (0.43 – 0.91)  | 0.95 (0.60 – 1.51)  |
| 12-14                                          | 0.57 (0.39 – 0.83) | 0.72 (0.48 – 1.05)  | 1.45 (0.95 – 2.22)  |
| 15+                                            | 0.59 (0.29 – 1.20) | 0.75 (0.36 – 1.65)  | 1.97 (0.93 – 4.17)  |
| <b>Household smoking characteristics</b>       |                    |                     |                     |
| <b>Number of smokers</b>                       |                    |                     |                     |
| —                                              | —                  | 1.00                | 1.00                |
| One                                            | —                  | 1.68 (1.21 – 2.35)  | 1.59 (1.13 – 2.23)  |
| Two                                            | —                  | 2.60 (1.67 – 4.06)  | 2.29 (1.44 – 3.64)  |
| Three or more                                  | —                  | 7.96 (3.70 – 17.11) | 7.22 (3.16 – 16.46) |
| <b>Household smoking rule</b>                  |                    |                     |                     |
| —                                              | —                  | —                   | —                   |
| Not allowed                                    | —                  | 1.00                | 1.00                |
| Generally not allowed                          | —                  | 1.21 (0.76 – 1.94)  | 1.32 (0.82 – 2.15)  |
| Allowed                                        | —                  | 1.53 (1.10 – 2.13)  | 1.49 (1.06 – 2.09)  |
| <b>Adolescents' characteristics</b>            |                    |                     |                     |
| <b>Sex</b>                                     |                    |                     |                     |
| Male                                           | 1.00               | 1.00                | 1.00                |
| Female                                         | 0.45 (0.34 - 0.61) | 0.43 (0.33 - 0.59)  | 0.45 (0.32 – 0.62)  |
| <b>Age (years)</b>                             |                    |                     |                     |
| 15-16                                          | 1.00               | 1.00                | 1.00                |
| 17-19                                          | 3.89 (2.71 - 5.58) | 3.95 (2.74 - 5.69)  | 2.38 (1.62 – 3.49)  |
| <b>Social Status</b>                           |                    |                     |                     |
| —                                              | —                  | —                   | —                   |
| Full student                                   | —                  | —                   | 1.00                |
| Only working or working and studying           | —                  | —                   | 2.81 (1.86 – 4.25)  |
| Neither studying/Neither working               | —                  | —                   | 4.56 (2.85 – 7.30)  |
| <b>School delay (years)</b>                    |                    |                     |                     |
| —                                              | —                  | —                   | —                   |
| None                                           | —                  | —                   | 1.00                |
| One                                            | —                  | —                   | 2.34 (1.37 – 3.96)  |
| Two                                            | —                  | —                   | 2.81 (1.69 – 4.69)  |

1  
2  
3  
4  
5  
6  
7  
8  
9  
10  
11  
12  
13  
14  
15  
16  
17  
18  
19  
20  
21  
22  
23  
24  
25  
26  
27  
28  
29  
30  
31  
32  
33  
34  
35  
36  
37  
38  
39  
40  
41  
42  
43  
44  
45  
46  
47  
48  
49  
50  
51  
52  
53  
54  
55  
56  
57  
58  
59  
60

---

Four or more

4.27 (2.87 – 6.35)

---

Source: Brazilian National Household Sample Survey (PNAD, 2008) and Global Tobacco Survey (GATS-2008)

\*Report of having smoked 100 cigarettes in lifetime and currently smoking every day or not every day.

All models adjusted for age, sex.

For peer review only



**REFERENCES**

1. WHO. [http://www.who.int/tobacco/surveillance/en\\_tfi\\_gats\\_2010\\_brazil.pdf](http://www.who.int/tobacco/surveillance/en_tfi_gats_2010_brazil.pdf). (Accessed 20 May 2013).
2. Levy D, de Almeida LM, Szklo A. The Brazil SimSmoke Policy Simulation Model: The Effect of Strong Tobacco Control Policies on Smoking Prevalence and Smoking-Attributable Deaths in a Middle Income Nation. *PLoS Med* 2012; 9: e1001336.
3. Szklo AS, de Almeida LM, Figueiredo VC, et al. A snapshot of the striking decrease in cigarette smoking prevalence in Brazil between 1989 and 2008. *Prev Med* 2012; 54: 162–67.
4. Hosseinpoor AR, Parker LA, d'Espaignet ET al. Socioeconomic Inequality in Smoking in Low-Income and Middle-Income Countries: Results from the World Health Survey. *PLoS One*. 2012; 7: e42843.
5. Instituto Nacional de Câncer (Brasil). Global adult tobacco survey Brazil 2008 / Instituto Nacional de Câncer. – Rio de Janeiro: INCA, 2010, 208 p. Available at : [http://www.who.int/tobacco/surveillance/en\\_tfi\\_gats\\_2010\\_brazil.pdf](http://www.who.int/tobacco/surveillance/en_tfi_gats_2010_brazil.pdf).
6. Federico B, Costa G, Kunst AE. Educational inequalities in initiation, cessation, and prevalence of smoking among 3 Italian birth cohorts. *Am J Public Health*. 2007;97(5):838-45.
7. Giovino GA, Mirza SA, Samet JM, et al. Tobacco use in 3 billion individuals from 16 countries: an analysis of nationally representative cross-sectional household surveys. *Lancet* 2012; 380:668-79.
8. Palipudi KM, Gupta PC, Sinha DN, et al. Social determinants of health and tobacco use in thirteen low and middle income countries: evidence from Global Adult Tobacco Survey. *PLoS One* 2012; 7: e33466.

- 1  
2  
3 9. Moolchan ET, Ernst M, Henningfield JE. A review of tobacco smoking in  
4 adolescents: treatment implications. *J Am Acad Child Adolesc Psychiatry* 2000; 39:682-  
5 93.  
6  
7  
8  
9  
10 10. Park S, Lee JY, Song TM et al. Age-associated changes in nicotine dependence.  
11 *Publ. Health* 2012; 126: 482–89.  
12  
13  
14 11. Greenwood PA, Engels RC, Olsson CA ET AL. Patterns of adolescent smoking and  
15 later nicotine dependence in young adults: a 10-year prospective study. *Public*  
16 *Health* 2010; 124:65-70.  
17  
18  
19  
20  
21 12. O’Loughlin J, DiFranza J, Tyndale RF et al. Nicotine-dependence symptoms are  
22 associated with smoking frequency in adolescents. *Am J Prev Med* 2003; 25: 219–25.  
23  
24  
25 13. Riggs NR, Chou CP, Li CY, Pentz MA. Adolescent to emerging adulthood smoking  
26 trajectories: when do smoking trajectories diverge, and do they predict early adulthood  
27 nicotine dependence? *Nicotine Tob Res* 2007; 9:1147–54.  
28  
29  
30  
31  
32 14. Household survey on behaviour risk factors and self-reported non-communicable  
33 diseases. Rio de Janeiro: National Cancer Institute, Health Surveillance Division,  
34 Ministry of Health; 2004.  
35  
36  
37  
38 15. Goldade K, Choi K, Bernat DH, et al. Multilevel predictors of smoking initiation  
39 among adolescents: findings from the Minnesota Adolescent Community Cohort  
40 (MACC) study. *Prev Med* 2012; 54:242-6.  
41  
42  
43  
44  
45 16. Tjora T, Hetland J, Aarø LE et al. Distal and proximal family predictors of  
46 adolescents' smoking initiation and development: A longitudinal latent curve model  
47 analysis *BMC Public Health* 2011; 11:911.  
48  
49  
50  
51  
52 17. Hallal PC, Clark VL, Assunção MC ET AL. Socioeconomic trajectories from birth  
53 to adolescence and risk factors for noncommunicable disease: prospective analyses. *J*  
54 *Adolesc Health* 2012; 51(6 Suppl):S32-S7  
55  
56  
57  
58  
59  
60

- 1  
2  
3 18. Barreto SM, Giatti L, Casado L, et al. Contextual factors associated  
4 with smoking among Brazilian adolescents. *J Epidemiol Community Health* 2012; 66:  
5 723–29.  
6  
7  
8  
9  
10 19. Sanchez ZM, Opaleye ES, Martins SS et AL. Adolescent gender differences in the  
11 determinants of tobacco smoking: a cross sectional survey among high school students  
12 in São Paulo. *BMC Public Health* 2010; 10: 748.  
13  
14  
15  
16 20. Victora CG, Huttly SR, Fuchs SC et al. The role of conceptual frameworks in  
17 epidemiological analysis: a hierarchical approach. *Int J Epidemiol* 1997; 26:224-7.  
18  
19  
20  
21 21. Schuck K, Otten R, Engels RC et AL. Birectional influences between parents and  
22 children in smoking behavior: a longitudinal full-family model. *Nicotine Tob Res* 2013;  
23 15:44-51.  
24  
25  
26  
27 22. Christakis NA, Fowler JH. Social contagion theory: examining  
28 dynamic social networks and human behavior. *Stat Med* 2013; 32:556-77.  
29  
30  
31  
32 23. Wardle J, Jarvis MJ, Steggle N et al. Socioeconomic disparities in cancer-  
33 risk behaviors in adolescence: baseline results from the Health and  
34 Behaviour in Teenagers Study (HABITS). *Prev Med* 2003;36:721-30.  
35  
36  
37  
38 24. De Ridder KA, Pape K, Johnsen R et al. School dropout: a major public health  
39 challenge: a 10-year prospective study on medical and non-medical social insurance  
40 benefits in young adulthood, the Young-HUNT 1 Study (Norway). *J Epidemiol*  
41 *Community Health* 2012; 66:995-1000.  
42  
43  
44  
45  
46  
47 25. Maralani V. Educational inequalities in smoking: the role of initiation versus  
48 quitting. *Soc Sci Med*. 2013;84:129-37  
49  
50  
51  
52 26. Martin LT, Haas A, Schonlau M, et al. Which literacy skills are associated with  
53 smoking? *J Epidemiol Community Health* 2012; 66:189-92.  
54  
55  
56  
57  
58  
59  
60

1  
2  
3 27. Henry KL ,Knight KE, Thornberry TP. School disengagement as a predictor of  
4 dropout, delinquency, and problem substance use during adolescence and early  
5 adulthood. *J Youth Adolesc* 2012; 41:156-66.  
6  
7

8  
9 28. IPEA  
10 [http://www.ipea.gov.br/portal/index.php?option=com\\_content&view=article&id=15818](http://www.ipea.gov.br/portal/index.php?option=com_content&view=article&id=15818)  
11 &catid=159&Itemid=75. (accessed 15 Feb 2013)  
12  
13  
14

15  
16 29. Gilman SE, Rende R, Boergers J, et al. Parental smoking and adolescent smoking  
17 initiation: an intergenerational perspective on tobacco control. *Pediatrics* 2009; 123:  
18 e274-8.  
19  
20  
21

22  
23 30. Wang MP, Ho SY, Lo WS, et al. Smoking Family, Second-hand Smoke Exposure at  
24 Home, and Quitting in Adolescent Smokers. *Nicotine Tob Res* 2012; [Epub ahead of  
25 print].  
26  
27  
28

29  
30 31. Emory K, Saquib N, Gilpin EA et al. The association between  
31 home smoking restrictions and youth smoking behaviour: a review. *Tob Control* 2010;  
32 19:495-506.  
33  
34  
35

36  
37 32. Fichtenberg CM, Glantz SA. Effect of smoke-free workplaces on smoking  
38 behaviour: systematic review. *Br Med J* 2002;325:188.  
39  
40

41  
42 33. Mills AL, Messer K, Gilpin E, et al. The effect of smoke-free homes on adult  
43 smoking behavior: a review. *Nicotine Tob Res* 2009;11:1131-41.  
44  
45  
46  
47  
48  
49  
50  
51  
52  
53  
54  
55  
56  
57  
58  
59  
60

STROBE Checklist of items that should be included in reports of *cross-sectional studies*

Title: Socioeconomic inequalities among youth smoking in Brazil

Authors: Barreto SM, Figueiredo RC, Giatti L

|                              | Item No | Recommendation                                                                                                                                                                                    |    |
|------------------------------|---------|---------------------------------------------------------------------------------------------------------------------------------------------------------------------------------------------------|----|
| <b>Title and abstract</b>    | 1       | (a) Indicate the study's design with a commonly used term in the title or the abstract                                                                                                            | ok |
|                              |         | (b) Provide in the abstract an informative and balanced summary of what was done and what was found                                                                                               | ok |
| <b>Introduction</b>          |         |                                                                                                                                                                                                   |    |
| Background/rationale         | 2       | Explain the scientific background and rationale for the investigation being reported                                                                                                              | ok |
| Objectives                   | 3       | State specific objectives, including any prespecified hypotheses                                                                                                                                  | ok |
| <b>Methods</b>               |         |                                                                                                                                                                                                   |    |
| Study design                 | 4       | Present key elements of study design early in the paper                                                                                                                                           | ok |
| Setting                      | 5       | Describe the setting, locations, and relevant dates, including periods of recruitment, exposure, follow-up, and data collection                                                                   | ok |
| Participants                 | 6       | (a) Give the eligibility criteria, and the sources and methods of selection of participants                                                                                                       | ok |
| Variables                    | 7       | Clearly define all outcomes, exposures, predictors, potential confounders, and effect modifiers. Give diagnostic criteria, if applicable                                                          | ok |
| Data sources/<br>measurement | 8*      | For each variable of interest, give sources of data and details of methods of assessment (measurement). Describe comparability of assessment methods if there is more than one group              | ok |
| Bias                         | 9       | Describe any efforts to address potential sources of bias                                                                                                                                         | ok |
| Study size                   | 10      | Explain how the study size was arrived at                                                                                                                                                         | ok |
| Quantitative variables       | 11      | Explain how quantitative variables were handled in the analyses. If applicable, describe which groupings were chosen and why                                                                      | ok |
| Statistical methods          | 12      | (a) Describe all statistical methods, including those used to control for confounding                                                                                                             | ok |
|                              |         | (b) Describe any methods used to examine subgroups and interactions                                                                                                                               | ok |
|                              |         | (c) Explain how missing data were addressed                                                                                                                                                       | ok |
|                              |         | (d) If applicable, describe analytical methods taking account of sampling strategy                                                                                                                | ok |
|                              |         | (e) Describe any sensitivity analyses                                                                                                                                                             | ok |
| <b>Results</b>               |         |                                                                                                                                                                                                   |    |
| Participants                 | 13*     | (a) Report numbers of individuals at each stage of study—eg numbers potentially eligible, examined for eligibility, confirmed eligible, included in the study, completing follow-up, and analysed | ok |
|                              |         | (b) Give reasons for non-participation at each stage                                                                                                                                              | ok |
|                              |         | (c) Consider use of a flow diagram                                                                                                                                                                | ok |
| Descriptive data             | 14*     | (a) Give characteristics of study participants (eg demographic, clinical, social) and information on exposures and potential confounders                                                          | ok |
|                              |         | (b) Indicate number of participants with missing data for each variable of interest                                                                                                               | ok |
| Outcome data                 | 15*     | Report numbers of outcome events or summary measures                                                                                                                                              | ok |

|    |                          |    |                                                                                                                                                                                                              |
|----|--------------------------|----|--------------------------------------------------------------------------------------------------------------------------------------------------------------------------------------------------------------|
| 1  |                          |    |                                                                                                                                                                                                              |
| 2  | Main results             | 16 | (a) Give unadjusted estimates and, if applicable, confounder-adjusted estimates and their precision (eg, 95% confidence interval). Make clear which confounders were adjusted for and why they were included |
| 3  |                          |    |                                                                                                                                                                                                              |
| 4  |                          |    |                                                                                                                                                                                                              |
| 5  |                          |    |                                                                                                                                                                                                              |
| 6  |                          |    | (b) Report category boundaries when continuous variables were categorized                                                                                                                                    |
| 7  |                          |    |                                                                                                                                                                                                              |
| 8  |                          |    | (c) If relevant, consider translating estimates of relative risk into absolute risk for a meaningful time period                                                                                             |
| 9  |                          |    |                                                                                                                                                                                                              |
| 10 | Other analyses           | 17 | Report other analyses done—eg analyses of subgroups and interactions, and sensitivity analyses                                                                                                               |
| 11 |                          |    |                                                                                                                                                                                                              |
| 12 |                          |    |                                                                                                                                                                                                              |
| 13 | <b>Discussion</b>        |    |                                                                                                                                                                                                              |
| 14 | Key results              | 18 | Summarise key results with reference to study objectives                                                                                                                                                     |
| 15 | Limitations              | 19 | Discuss limitations of the study, taking into account sources of potential bias or imprecision. Discuss both direction and magnitude of any potential bias                                                   |
| 16 |                          |    |                                                                                                                                                                                                              |
| 17 |                          |    |                                                                                                                                                                                                              |
| 18 |                          |    |                                                                                                                                                                                                              |
| 19 | Interpretation           | 20 | Give a cautious overall interpretation of results considering objectives, limitations, multiplicity of analyses, results from similar studies, and other relevant evidence                                   |
| 20 |                          |    |                                                                                                                                                                                                              |
| 21 |                          |    |                                                                                                                                                                                                              |
| 22 |                          |    |                                                                                                                                                                                                              |
| 23 | Generalisability         | 21 | Discuss the generalisability (external validity) of the study results                                                                                                                                        |
| 24 |                          |    |                                                                                                                                                                                                              |
| 25 | <b>Other information</b> |    |                                                                                                                                                                                                              |
| 26 | Funding                  | 22 | Give the source of funding and the role of the funders for the present study and, if applicable, for the original study on which the present article is based                                                |
| 27 |                          |    |                                                                                                                                                                                                              |
| 28 |                          |    |                                                                                                                                                                                                              |
| 29 |                          |    |                                                                                                                                                                                                              |

\*Give information separately for exposed and unexposed groups.
